# Supplementary material for: Characteristics, outcomes and risk factors for mortality of 522 167 patients hospitalised with COVID-19 in Brazil: a retrospective cohort study
Source: PubMed Central journal article supplement — BMJ Open. 2021 May 4;11(5):e049089. doi: 10.1136/bmjopen-2021-049089 (PMC8098282; doi:10.1136/bmjopen-2021-049089), 2021-05-04

**Supplementary material for “Characteristics, outcomes and risk factors for mortality of 522,167 patients hospitalized with COVID-19 in Brazil: a retrospective cohort study”**

**Supplementary Table 1: Data completeness in the dataset of hospitalized individuals with confirmed COVID-19 from SIVEP-Gripe data (as of December 14, 2020)**

| Variable                                               | Missing | N       | % Complete |
|--------------------------------------------------------|---------|---------|------------|
| Hospitalization                                        | 0       | 522,167 | 100%       |
| Final diagnosis of the case                            | 0       | 522,167 | 100%       |
| Age informed by patient                                | 0       | 522,167 | 100%       |
| Type of age (day, month, year)                         | 0       | 522,167 | 100%       |
| Sex                                                    | 84      | 522,167 | 100%       |
| Gestational age                                        | 26,081  | 299,513 | 91%        |
| Puerperal <sup>a</sup>                                 | 133,695 | 299,513 | 55%        |
| Ethnoracial self-classification                        | 120,799 | 522,167 | 77%        |
| Federal unit of residence                              | 0       | 522,167 | 100%       |
| Municipality of residence <sup>b</sup>                 | 36      | 522,167 | 100%       |
| Municipality of notification                           | 0       | 522,167 | 100%       |
| Comorbidities <sup>a</sup>                             |         |         |            |
| Chronic cardiovascular disease                         | 246,121 | 522,167 | 53%        |
| Chronic hematologic diseases                           | 314,925 | 522,167 | 40%        |
| Chronic hepatic disease                                | 315,473 | 522,167 | 40%        |
| Asthma                                                 | 311,743 | 522,167 | 40%        |
| Diabetes                                               | 264,470 | 522,167 | 49%        |
| Chronic neurological disease                           | 309,103 | 522,167 | 41%        |
| Chronic lung disease                                   | 309,631 | 522,167 | 41%        |
| Immunodeficiency                                       | 312,874 | 522,167 | 40%        |
| Chronic renal disease                                  | 309,780 | 522,167 | 41%        |
| Obesity                                                | 306,964 | 522,167 | 41%        |
| Other comorbidities                                    | 272,160 | 522,167 | 48%        |
| Symptoms <sup>a</sup>                                  |         |         |            |
| Fever                                                  | 65,355  | 522,167 | 87%        |
| Cough                                                  | 56,324  | 522,167 | 89%        |
| Sore throat                                            | 140,061 | 522,167 | 73%        |
| Shortness of breath                                    | 56,843  | 522,167 | 89%        |
| Respiratory distress syndrome                          | 90,093  | 522,167 | 83%        |
| Other symptoms descriptive                             | 272,160 | 522,167 | 48%        |
| Chest radiograph result                                | 222,990 | 522,167 | 57%        |
| Type of drug treatment <sup>a</sup>                    | 434,008 | 522,167 | 17%        |
| Mechanical ventilation                                 | 75,907  | 522,167 | 85%        |
| ICU admission                                          | 56,310  | 522,167 | 89%        |
| Date of ICU discharge <sup>c</sup>                     | 46,919  | 522,167 | 91%        |
| Date of hospital discharge of death <sup>c</sup>       | 31,755  | 522,167 | 94%        |
| Date of onset of illness                               | 0       | 522,167 | 100%       |
| Date of treatment with drugs                           | 6,993   | 93,688  | 93%        |
| Date of hospitalization <sup>c</sup>                   | 3,170   | 522,167 | 99%        |
| Date of ICU admission <sup>c</sup>                     | 3,580   | 172,473 | 98%        |
| Date of case closed                                    | 8,457   | 468,664 | 98%        |
| Clinical outcome (discharge, death, still in hospital) | 11,126  | 522,167 | 98%        |

a. Unlike other fields (such as age and sex), comorbidities, symptoms, peruperal, and drugs are not mandatory. Non-response does not necessarily mean missing information, but absence of those conditions.

b. The 36 observations missing municipality of residence are foreigners.

c. Missingness in several date variables could be resolved by cross-checking with other variables. Doing so reduced missingness by 0.04-10.3 percentage points from the original missingness shown above.

**Supplementary Figure 1: Cumulative number of COVID-19 hospitalizations, ICU admissions, and deaths.** Although hospitalizations occurred early in January, confirmed laboratory results were only made available in late February.

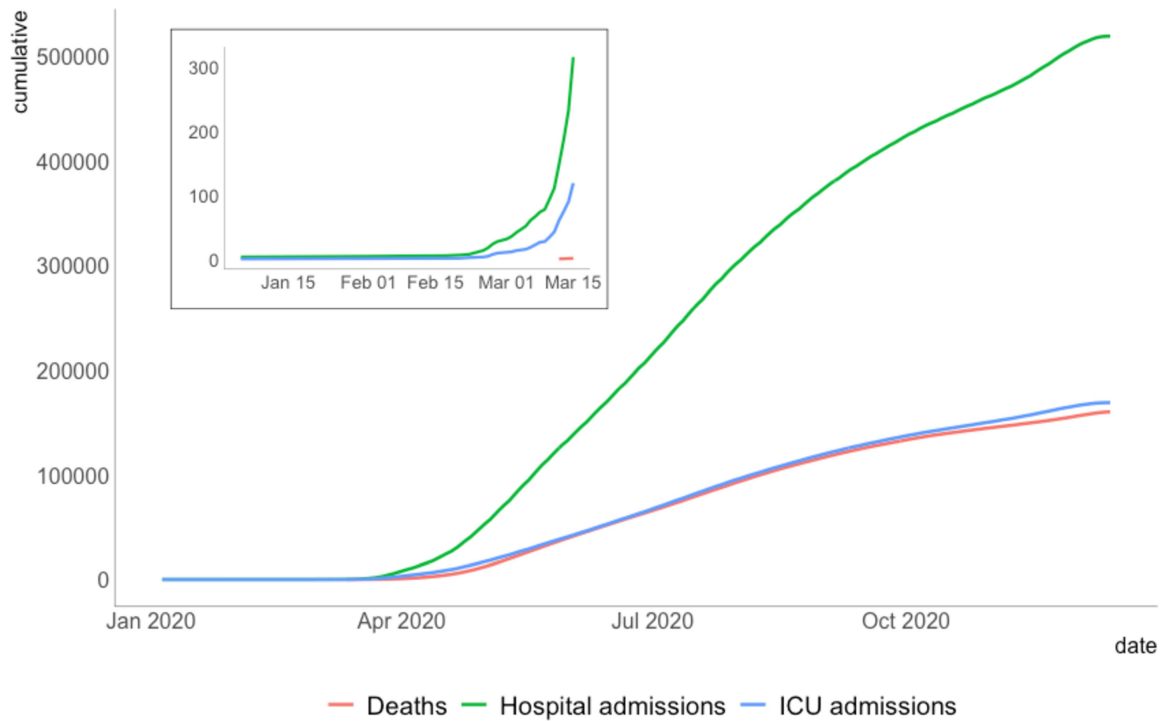

**Supplementary Figure 2: Survival curves (Kaplan Meier) 60 days after hospital admission:**

Note: N = North, NE = Northeast, CW = Center-West, SE = Southeast, S = South

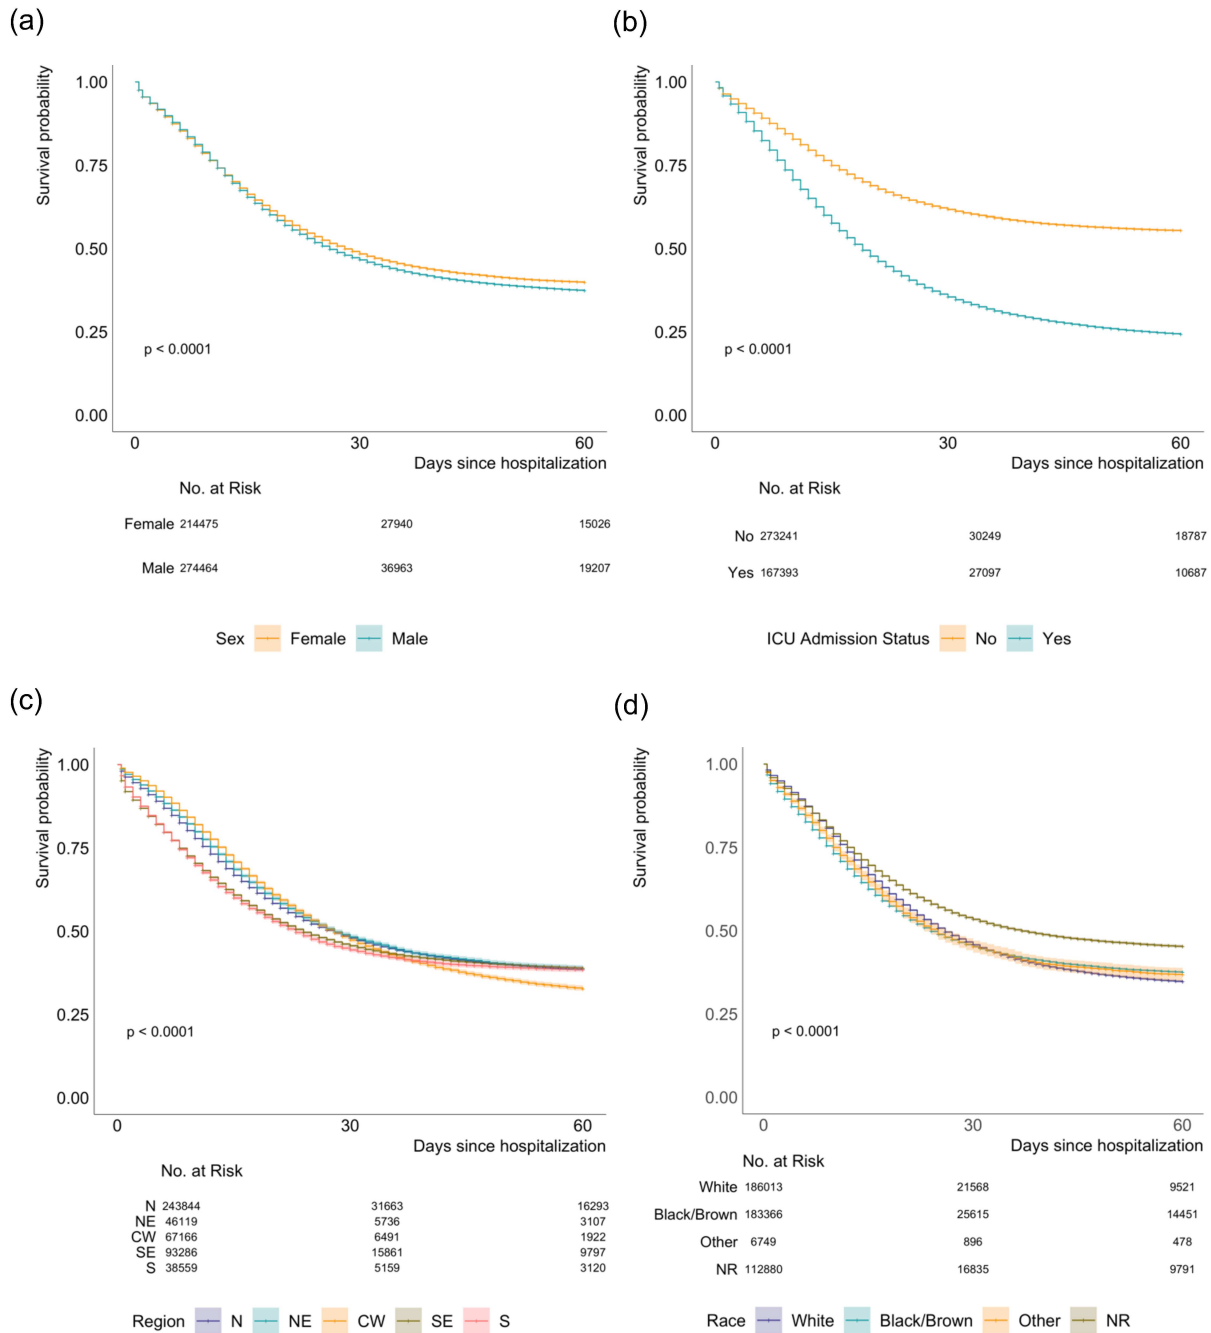

Supplement: bmjopen-2021-049089supp001.pdf [file bmjopen-2021-049089supp001.pdf]
