# Supplementary material for: Characteristics, outcomes and risk factors for mortality of 522 167 patients hospitalised with COVID-19 in Brazil: a retrospective cohort study
Source: PubMed Central journal article supplement — BMJ Open. 2021 May 4;11(5):e049089. doi: 10.1136/bmjopen-2021-049089 (PMC8098282; doi:10.1136/bmjopen-2021-049089), 2021-05-04
Supplement: bmjopen-2021-049089.draft_revisions.pdf [file bmjopen-2021-049089.draft_revisions.pdf]

# BMJ Open

BMJ Open is committed to open peer review. As part of this commitment we make the peer review history of every article we publish publicly available.

When an article is published we post the peer reviewers' comments and the authors' responses online. We also post the versions of the paper that were used during peer review. These are the versions that the peer review comments apply to.

The versions of the paper that follow are the versions that were submitted during the peer review process. They are not the versions of record or the final published versions. They should not be cited or distributed as the published version of this manuscript.

BMJ Open is an open access journal and the full, final, typeset and author-corrected version of record of the manuscript is available on our site with no access controls, subscription charges or pay-per-view fees (<http://bmjopen.bmj.com>).

If you have any questions on BMJ Open's open peer review process please email [info.bmjopen@bmj.com](mailto:info.bmjopen@bmj.com)

# BMJ Open

## Characteristics, outcomes and risk factors for mortality of 522,167 patients hospitalized with COVID-19 in Brazil: a retrospective cohort study

|                               |                                                                                                                                                                                                                                                                                                                                                                                                         |
|-------------------------------|---------------------------------------------------------------------------------------------------------------------------------------------------------------------------------------------------------------------------------------------------------------------------------------------------------------------------------------------------------------------------------------------------------|
| Journal:                      | <i>BMJ Open</i>                                                                                                                                                                                                                                                                                                                                                                                         |
| Manuscript ID                 | bmjopen-2021-049089                                                                                                                                                                                                                                                                                                                                                                                     |
| Article Type:                 | Original research                                                                                                                                                                                                                                                                                                                                                                                       |
| Date Submitted by the Author: | 14-Jan-2021                                                                                                                                                                                                                                                                                                                                                                                             |
| Complete List of Authors:     | Castro, Marcia; Harvard University T H Chan School of Public Health, Global Health and Population<br>Gurzenda, Susie; Harvard University T H Chan School of Public Health, Global Health and Population<br>Macário, Eduardo; Brazilian Ministry of Health, Secretariat of Health Surveillance<br>Araújo de França, Giovanny ; Brazilian Ministry of Health, Secretariat of Health Surveillance Brasilia |
| Keywords:                     | Public health < INFECTIOUS DISEASES, COVID-19, PUBLIC HEALTH                                                                                                                                                                                                                                                                                                                                            |
|                               |                                                                                                                                                                                                                                                                                                                                                                                                         |

SCHOLARONE™  
Manuscripts

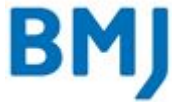

I, the Submitting Author has the right to grant and does grant on behalf of all authors of the Work (as defined in the below author licence), an exclusive licence and/or a non-exclusive licence for contributions from authors who are: i) UK Crown employees; ii) where BMJ has agreed a CC-BY licence shall apply, and/or iii) in accordance with the terms applicable for US Federal Government officers or employees acting as part of their official duties; on a worldwide, perpetual, irrevocable, royalty-free basis to BMJ Publishing Group Ltd ("BMJ") its licensees and where the relevant Journal is co-owned by BMJ to the co-owners of the Journal, to publish the Work in this journal and any other BMJ products and to exploit all rights, as set out in our [licence](#).

The Submitting Author accepts and understands that any supply made under these terms is made by BMJ to the Submitting Author unless you are acting as an employee on behalf of your employer or a postgraduate student of an affiliated institution which is paying any applicable article publishing charge ("APC") for Open Access articles. Where the Submitting Author wishes to make the Work available on an Open Access basis (and intends to pay the relevant APC), the terms of reuse of such Open Access shall be governed by a Creative Commons licence – details of these licences and which [Creative Commons](#) licence will apply to this Work are set out in our licence referred to above.

Other than as permitted in any relevant BMJ Author's Self Archiving Policies, I confirm this Work has not been accepted for publication elsewhere, is not being considered for publication elsewhere and does not duplicate material already published. I confirm all authors consent to publication of this Work and authorise the granting of this licence.

1  
2  
3 **1 Characteristics, outcomes and risk factors for mortality of 522,167 patients**  
4  
5  
6 **2 hospitalized with COVID-19 in Brazil: a retrospective cohort study**  
7  
8  
9  
10

11 4 Marcia C. Castro, PhD<sup>1\*</sup>, Susie Gurzenda, SM<sup>1</sup>, Eduardo Marques Macário, PhD<sup>2</sup>, Giovanni V.  
12  
13 5 A. França, PhD<sup>2</sup>  
14  
15

16 6  
17  
18 7 <sup>1</sup> Harvard T.H. Chan School of Public Health, Department of Global Health and Population, 665  
19  
20 8 Huntington Avenue, Building 1, 11th floor, Boston, MA 02115, United States of America  
21  
22

23 9 <sup>2</sup> Secretariat of Health Surveillance, Brazilian Ministry of Health, Setor de Rádio e Televisão  
24  
25 10 Norte (SRTV) 701, Via W5 Norte, Edifício PO700. Brasília, Distrito Federal, 70719-040, Brazil  
26  
27

28 11  
29  
30  
31 12 \* Corresponding author: Harvard T.H. Chan School of Public Health, Department of Global  
32  
33 13 Health and Population, 665 Huntington Avenue, Building 1, 11th floor, room 1102A, Boston,  
34  
35 14 MA 02115, United States of America. Tel: +1-617-432-6731. Email: mcastro@hsph.harvard.edu  
36  
37  
38

39 15  
40  
41 16 **Word count: 2,750**  
42  
43 17  
44  
45 18  
46  
47  
48  
49  
50  
51  
52  
53  
54  
55  
56  
57  
58  
59  
60

## 19 ABSTRACT

### 20 Objective

21 To provide a comprehensive description of demographic, clinical, and radiographic  
22 characteristics; treatment and case outcomes; and risk factors associated with in-hospital death of  
23 patients hospitalized with COVID-19 in Brazil.

### 25 Design

26 Retrospective cohort study of hospitalized patients diagnosed with COVID-19.

### 28 Setting

29 Data from all hospitals across Brazil.

### 31 Participants

32 522,167 hospitalized patients in Brazil by December 14, 2020 with severe acute respiratory  
33 illness, and a confirmed diagnosis for COVID-19.

### 35 Primary and Secondary Outcome Measures

36 Prevalence of symptoms and comorbidities were compared by clinical outcomes and intensive  
37 care unit (ICU) admission status. Survival was assessed using Kaplan Meier survival estimates.  
38 Risk factors associated with in-hospital death were evaluated with multivariable Cox  
39 proportional hazards regression.

### 41 Results

42 Of the 522,167 patients included in this study, 56.7% were discharged, 0.002% died of other  
43 causes, 30.7% died of causes associated with COVID-19, and 10.2% remained hospitalized. The  
44 median age of patients was 61 years (interquartile range [IQR], 47-73), and of non-survivors 71  
45 years (IQR, 60-80); 292,570 patients (56.0%) were men. At least one comorbidity was present in  
46 64.5% of patients and in 76.8% of non-survivors. From illness onset, the median times to  
47 hospital and ICU admission were 6 days (IQR, 3-9) and 7 days (IQR, 3-10), respectively; 15  
48 days (IQR, 9-24) to death, and 15 days (IQR, 11-20) to hospital discharge. Risk factors for in-  
49 hospital death included old age, Black/Brown ethnoracial self-classification, ICU admission,  
50 being male, living in the North and Northeast regions, and various co-morbidities. Age had the  
51 highest hazard ratios of 5.51 (95% CI: 4.91-6.18) for patients  $\geq 80$ , compared to those  $\leq 20$ .

### 53 Conclusions

54 Characteristics of patients and risk factors for in-hospital mortality highlight inequities of  
55 COVID-19 outcomes in Brazil. As the pandemic continues to unfold, targeted policies that  
56 address those inequities are needed to mitigate the unequal burden of COVID-19.

## STRENGTHS AND LIMITATIONS OF THIS STUDY

- The strength of this study is that it leverages Brazil's established national Influenza Epidemiological Surveillance Information System data to present comprehensive characteristics, clinical course, and risk factors for COVID-19 in-hospital deaths across Brazil.
- Administrative records lack details available in hospital medical records and may have accuracy and completeness problems.
- We did not have access to laboratory results other than COVID-19 tests (e.g., complete blood count) that would allow for a better characterization of the clinical course of the disease.
- COVID-19 deaths at home likely follow a different clinical course than deaths in the hospital and are not included in this analysis.
- In-hospital deaths due to COVID-19 are likely under-reported and are limited by the testing protocol and capacity of each hospital.

## 73 INTRODUCTION

74 On March 11 the World Health Organization declared COVID-19 as a pandemic. Caused by the  
75 novel coronavirus SARS-CoV-2, it emerged in China and quickly spread across the country and  
76 beyond. As of January 4, 2021, it was present in 222 countries and territories, with 83,910,386  
77 confirmed cases and 1,839,660 confirmed deaths.<sup>1</sup> Brazil recorded the first confirmed COVID-  
78 19 case on February 26 and the first death on March 12, both in São Paulo State. In 24 days, the  
79 disease had spread to all Federal Units. As of January 4, 2021, 7,716,405 cases (9% of  
80 worldwide cases) and 195,725 deaths (over 10% of worldwide deaths) had been reported in  
81 Brazil, the second-highest in the world, behind only the US. These numbers are underestimated  
82 since most mild cases are not being tested and thus are not likely to be reported, and some deaths  
83 may be reported with ill-defined causes, or not reported at all.

84 Brazil has a comprehensive health information system,<sup>2</sup> with the systematic collection of births,  
85 deaths, hospitalizations, and diseases of mandatory notification, among others. However, a  
86 complete and linked registry of records combining data from ambulatory and inpatient care,  
87 laboratory and radiologic results, and outcome of the disease is not available. Therefore, there is  
88 limited information on the course of the disease for every case reported in Brazil.

89 Currently, the most detailed data available in Brazil refer to hospitalizations due to severe acute  
90 respiratory illness (SARI). Here, we use these data to provide a comprehensive description of  
91 demographic, clinical, and radiographic characteristics, treatment, case outcome, and risk factors  
92 associated with in-hospital death of patients hospitalized with SARI with a confirmed diagnosis  
93 for COVID-19, as of December 14, 2020. We analyze the largest retrospective number of cases  
94 (N=522,167) and we assess whether the Brazilian case is comparable to patterns previously  
95 described for other countries.

1  
2  
3 96  
4  
56 97 **METHODS**8  
9 98 **Data Sources**

10 99 We used de-identified records from the Influenza Epidemiological Surveillance Information  
11  
12 100 System (*Sistema de Informação de Vigilância Epidemiológica da Gripe, SIVEP-Gripe*, in  
13  
14 101 Portuguese), an information system of the Ministry of Health that captures all notifications of  
15  
16 102 SARI hospitalizations in both public and private hospitals. The system is updated daily, and  
17  
18 103 every two weeks a new dataset is made publicly available  
19  
20  
21 104 (<https://opendatasus.saude.gov.br/nl/dataset>). Here we analyzed records as of December 14, 2020  
22  
23  
24 105 (N=1,029,684 notifications), after 15,419 duplicate records were removed by the Ministry of  
25  
26 106 Health. Each record has data on patient's age, sex, place of residence and of hospitalization,  
27  
28 107 ethnoracial self-classification,<sup>3</sup> pregnancy status, comorbidities, and symptoms; drug treatment;  
29  
30 108 radiologic test results; and dates of illness onset, hospitalization, ICU admission, and outcome  
31  
32 109 (death, release, still hospitalized). We considered only records of patients hospitalized with a  
33  
34 110 confirmed diagnosis for COVID-19 (N = 522,167). Diagnosis followed the Ministry of Health  
35  
36 111 guidelines.<sup>4</sup>

37  
38  
39  
40  
41  
42 112  
43  
44 113 **Statistical Analysis**

45  
46 114 Characteristics of inpatients were summarized in three groups: demographic, clinical and  
47  
48 115 radiographic, and treatment and outcomes. Medians and interquartile ranges (IQR) were used to  
49  
50 116 describe continuous variables, and counts and percentages to describe categorical variables.  
51  
52  
53 117 Differences between inpatients that needed and did not need ICU admission and those that  
54  
55 118 survived and did not survive were assessed by Whitney U,  $\chi^2$ , or Fisher's exact test, as



1  
2  
3 119 appropriate. No data imputation was performed for missing data (see online supplementary table  
4  
5 120 1 for information on data completeness).  
6  
7  
8 121 Survival curves of inpatients at 60 days of hospitalization by age, sex, ethnoracial self-  
9  
10 122 classification, region, and ICU admission were estimated using the Kaplan-Meier estimator and  
11  
12 123 compared with the log-rank test. Factors associated with inpatient death were identified by  
13  
14 124 univariable and multivariable logistic regression (excluding from the analysis those that  
15  
16 125 remained hospitalized). Considering time to death as the outcome, hazard ratios were estimated  
17  
18 126 using Cox proportional-hazards models. Based on previous studies<sup>5-7</sup> and on our available  
19  
20 127 information, covariates included in both logistic and Cox models were age (0-19, 20-39, 40-59,  
21  
22 128 60-69, 70-79, and 80 or more years), sex, ethnoracial self-classification (White, Black/Brown,  
23  
24 129 other, not reported), region (North – where Amazonia is located, Northeast, South, Southeast –  
25  
26 130 where the cities of São Paulo and Rio de Janeiro are located, and Center-West), comorbidities  
27  
28 131 (diabetes, asthma, chronic liver disease, chronic neurological disease, chronic lung disease,  
29  
30 132 immunodeficiency, and chronic kidney disease), obesity, and ICU admission. The variable  
31  
32 133 ethnoracial self-classification was missing in 23.1% of the records, and we added those as a  
33  
34 134 separate category (not reported). Distances between municipalities of residence and  
35  
36 135 hospitalization were calculated in ArcMap, version 10.6 (ESRI, Redlands, CA, USA). All  
37  
38 136 analyses were performed in Stata, version 15.1 (Stata Corp., College Station, TX, USA), and R  
39  
40 137 version 4.0.0 (RStudio Team, Boston, MA, USA).  
41  
42  
43  
44  
45  
46  
47  
48

### 49 139 **Patient and public involvement**

50  
51 140 Our analysis used administrative records, and thus study participants were not involved in the  
52  
53 141 design of the study. Public involvement was achieved through collaboration with the Ministry of  
54  
55  
56  
57  
58  
59  
60

1  
2  
3 142 Health, with whom we defined the research questions to fill in knowledge gaps and inform  
4  
5 143 decision making. Results were discussed and shared with the Ministry, and their wide  
6  
7 144 dissemination with public health officials, researchers, and through the media will reach the  
8  
9  
10 145 broader public.  
11  
12  
13  
14  
15

## 16 147 **RESULTS**

17  
18  
19 148 As of December 14, 2020, 522,167 patients had been hospitalized with confirmed COVID-19  
20  
21 149 since the beginning of the epidemic in Brazil. Of those, 296,002 (56.7%) were discharged, 1,004  
22  
23 150 (0.002%) died of other causes, 160,495 (30.7%) died of causes associated with COVID-19,  
24  
25 151 53,503 (10.2%) remained hospitalized. Clinical outcome was unknown for 11,126 (2.1%)  
26  
27 152 patients (table 1). The cumulative curve of hospital admissions (online supplementary figure 1)  
28  
29 153 shows the fast increase in severe cases that required hospitalization, following the steep increase  
30  
31 154 in COVID-19 transmission in Brazil since the end of March. The median age of patients was 61  
32  
33 155 years (IQR, 47-73), and much higher for non-survivors, 71 years (IQR, 60-80), as shown by the  
34  
35 156 age distribution in figures 1a-b. Patients aged 60 years or more represented 50.1% of  
36  
37 157 hospitalizations, 59.0% of ICU admissions, and 74.0% of deaths associated with COVID-19.  
38  
39 158 Patients were mostly males (56.0%) and from the Southeast region (49.3%). Among females,  
40  
41 159 2.5% were pregnant or puerperal at the time of hospitalization, and 7.5% of those died in the  
42  
43 160 hospital. A total of 172,473 (33.0%) patients with median age of 65 years (IQR, 52-76) needed  
44  
45 161 ICU admission. Of all hospitalizations, 37.7% of the patients were White, and 37.9% were  
46  
47 162 Black/Brown. Among survivors, 38.8% were White, while among non-survivors 41.7% were  
48  
49 163 Black/Brown. About 25% of the patients traveled a median of 32.0 km (IQR, 18.6-64.1) to be  
50  
51 164 hospitalized in a municipality different from where they reside (table 1).  
52  
53  
54  
55  
56  
57  
58  
59  
60

Table 1. Demographic characteristics of patients

| Characteristic                                             | All patients<br>(N = 522,167) <sup>a</sup> | ICU<br>admission<br>(N = 172,473) | Non-ICU<br>admission<br>(N = 293,384) | Not reported<br>(N = 56,310) | p-<br>value | Survivor &<br>non-COVID-<br>19 death<br>(N = 297,043) | Non-survivor<br>(N = 160,495) <sup>b</sup> | Still in the<br>hospital<br>(N = 53,503) | p-<br>value |
|------------------------------------------------------------|--------------------------------------------|-----------------------------------|---------------------------------------|------------------------------|-------------|-------------------------------------------------------|--------------------------------------------|------------------------------------------|-------------|
| Age                                                        |                                            |                                   |                                       |                              |             |                                                       |                                            |                                          |             |
| Median (IQR) - years                                       | 61 (47-73)                                 | 65 (52-76)                        | 59 (45-72)                            | 61 (47-74)                   | <0.001      | 56 (42-68)                                            | 71 (60-80)                                 | 60 (46-72)                               | <0.001      |
| Distribution, number (%)                                   |                                            |                                   |                                       |                              | <0.001      |                                                       |                                            |                                          | <0.001      |
| 0-19                                                       | 13,136 (2.5)                               | 3,211 (1.9)                       | 8,517 (2.9)                           | 1,408 (2.5)                  |             | 9,994 (3.4)                                           | 985 (0.6)                                  | 1,628 (3.0)                              |             |
| 20-39                                                      | 71,728 (13.7)                              | 16,978 (9.8)                      | 46,823 (16.0)                         | 7,927 (14.1)                 |             | 54,889 (18.5)                                         | 7,299 (4.6)                                | 7,814 (14.6)                             |             |
| 40-59                                                      | 170,266 (32.6)                             | 50,445 (29.3)                     | 101,922 (34.7)                        | 17,899 (31.8)                |             | 114,769 (38.6)                                        | 33,405 (20.8)                              | 18,196 (34.0)                            |             |
| 60-69                                                      | 108,416 (20.8)                             | 39,362 (22.8)                     | 57,404 (19.6)                         | 11,650 (20.7)                |             | 56,788 (19.1)                                         | 38,044 (23.7)                              | 11,352 (21.2)                            |             |
| 70-79                                                      | 90,800 (17.4)                              | 35,944 (20.8)                     | 44,943 (15.3)                         | 9,913 (17.6)                 |             | 38,304 (12.9)                                         | 41,883 (26.1)                              | 8,942 (16.7)                             |             |
| ≥ 80                                                       | 67,808 (13.0)                              | 26,530 (15.4)                     | 33,769 (11.5)                         | 7,509 (13.3)                 |             | 22,303 (7.5)                                          | 38,872 (24.2)                              | 5,570 (10.4)                             |             |
| Sex, number (%)                                            |                                            |                                   |                                       |                              | <0.001      |                                                       |                                            |                                          | <0.001      |
| Male                                                       | 292,570 (56.0)                             | 100,399 (58.2)                    | 161,377 (55.0)                        | 30,794 (54.7)                |             | 163,967 (55.2)                                        | 92,376 (58.6)                              | 30,146 (56.3)                            |             |
| Female                                                     | 229,513 (44.9)                             | 72,060 (41.8)                     | 131,964 (45.0)                        | 25,489 (45.3)                |             | 133,028 (44.8)                                        | 68,101 (42.4)                              | 23,345 (43.6)                            |             |
| Pregnant, number (%)                                       | 4,441 (1.9)                                | 802 (1.1)                         | 3,249 (2.5)                           | 390 (1.5)                    | <0.001      | 3,603 (2.7)                                           | 230 (0.3)                                  | 469 (2.0)                                | <0.001      |
| Puerperal, number (%)                                      | 1,350 (0.6)                                | 426 (0.6)                         | 850 (0.6)                             | 74 (0.3)                     | <0.001      | 965 (0.7)                                             | 204 (0.4)                                  | 148 (0.6)                                | <0.001      |
| Ethnoracial, number (%)                                    |                                            |                                   |                                       |                              | <0.001      |                                                       |                                            |                                          | <0.001      |
| White                                                      | 196,035 (37.5)                             | 67,619 (39.2)                     | 114,339 (39.0)                        | 14,077 (25.0)                |             | 115,358 (38.8)                                        | 58,487 (36.4)                              | 19,257 (36.0)                            |             |
| Black/Brown                                                | 198,096 (37.9)                             | 61,450 (35.6)                     | 114,378 (39.0)                        | 22,268 (39.6)                |             | 106,312 (35.8)                                        | 66,889 (41.7)                              | 19,891 (37.2)                            |             |
| Other                                                      | 7,237 (1.4)                                | 2,135 (1.2)                       | 4,191 (1.4)                           | 911 (1.6)                    |             | 4,028 (1.4)                                           | 2,332 (1.5)                                | 710 (1.3)                                |             |
| Not reported                                               | 120,799 (23.1)                             | 41,269 (23.9)                     | 60,476 (20.6)                         | 19,054 (33.8)                |             | 71,345 (24.0)                                         | 32,787 (20.4)                              | 13,645 (25.5)                            |             |
| Region of residence, number (%)                            |                                            |                                   |                                       |                              | <0.001      |                                                       |                                            |                                          | <0.001      |
| North                                                      | 41,961 (8.0)                               | 10,024 (5.8)                      | 27,065 (9.2)                          | 4,872 (8.7)                  |             | 23,149 (7.8)                                          | 14,537 (9.1)                               | 3,559 (6.7)                              |             |
| Northeast                                                  | 104,213 (20.0)                             | 33,220 (19.3)                     | 50,377 (17.2)                         | 20,616 (36.6)                |             | 49,733 (16.7)                                         | 37,919 (23.6)                              | 12,695 (23.7)                            |             |
| Center-West                                                | 48,864 (9.4)                               | 16,581 (9.6)                      | 28,872 (9.8)                          | 3,411 (6.1)                  |             | 29,169 (9.8)                                          | 13,532 (8.4)                               | 4,759 (8.9)                              |             |
| Southeast                                                  | 257,503 (49.3)                             | 88,817 (51.5)                     | 144,010 (49.1)                        | 24,676 (43.8)                |             | 151,595 (51.0)                                        | 76,494 (47.7)                              | 25,050 (46.8)                            |             |
| South                                                      | 69,590 (13.3)                              | 23,814 (13.8)                     | 43,042 (14.7)                         | 2,734 (4.9)                  |             | 43,380 (14.6)                                         | 17,997 (11.2)                              | 7,439 (13.9)                             |             |
| Foreigner                                                  | 36 (0.0)                                   | 17 (0.0)                          | 18 (0.0)                              | 1 (0.0)                      |             | 17 (0.0)                                              | 16 (0.0)                                   | 1 (0.0)                                  |             |
| Hospital in the same municipality of residence, number (%) |                                            |                                   |                                       |                              | <0.001      |                                                       |                                            |                                          | <0.001      |
| Yes                                                        | 388,304 (74.4)                             | 118,002 (68.4)                    | 227,423 (77.5)                        | 42,879 (76.2)                |             | 224,134 (75.5)                                        | 116,664 (72.7)                             | 39,772 (74.3)                            |             |
| No                                                         | 133,827 (25.6)                             | 54,454 (31.6)                     | 65,943 (22.5)                         | 13,430 (23.9)                |             | 72,892 (24.5)                                         | 43,815 (27.3)                              | 13,730 (25.7)                            |             |
| Distance (km) from residence to hospital <sup>b</sup>      | 32.0 (18.4-64.1)                           | 35.6 (19.8-77.8)                  | 29.4 (18.0-56.6)                      | 25.8 (14.5-54.7)             | <0.001      | 29.8 (18.1-57.8)                                      | 34.1 (19.1-71.9)                           | 34.5 (18.8-75.9)                         | <0.001      |

<sup>a</sup> Includes 11,126 patients with unknown clinical outcome.

<sup>b</sup> Non-survivors are classified as those whose death was associated with COVID-19, according to the *SIVEP-Gripe* database. Those who had COVID-19 but died due to an unrelated cause are classified under "Survivor & non-COVID-19 death". Survivor N=296,002, non-COVID-19 death=1,041.

<sup>c</sup> Distances (measured in km) are calculated from the centroid of the notification municipality (consistent with municipality of hospitalization) to the centroid of the municipality of residence, using the South America Lambert Conformal Conic projection.

1  
2  
3 172 Comorbidities were observed in 64.5% of the patients, 74.6% of those who needed ICU  
4  
5 173 admission, 76.8% of non-survivors, and 58.5% of the survivors and those whose death was not  
6  
7 174 associated with COVID-19. With the exception of asthma, all comorbidities had a higher  
8  
9 175 prevalence among non-survivors (compared to all patients). The most common comorbidities  
10  
11 176 were chronic cardiovascular disease (34.5% of patients and 43.5% of non-survivors) and diabetes  
12  
13 177 (25.7% of patients and 33.0% of non-survivors). Obesity was reported in 7.4% of the patients  
14  
15 178 and 10.5% of those who needed ICU admission. The most common symptoms were fever,  
16  
17 179 cough, shortness of breath, low oxygen saturation, and respiratory distress symptoms (table 2).  
18  
19  
20  
21  
22  
23  
24  
25  
26  
27  
28  
29  
30  
31  
32  
33  
34  
35  
36  
37  
38  
39  
40  
41  
42  
43  
44  
45  
46  
47  
48  
49  
50  
51  
52  
53  
54  
55  
56  
57  
58  
59  
60

181 **Table 2. Clinical and radiographic characteristics of patients**

| Characteristic                 | All patients<br>(N = 522,167) <sup>a</sup> | ICU<br>admission<br>(N = 172,473) | Non-ICU<br>admission<br>(N = 293,384) | Not reported<br>(N = 56,310) | p-<br>value | Survivor &<br>non-COVID-<br>19 death<br>(N = 297,043) | Non-survivor<br>(N = 160,495) <sup>b</sup> | Still in the<br>hospital<br>(N = 53,503) | p-<br>value |
|--------------------------------|--------------------------------------------|-----------------------------------|---------------------------------------|------------------------------|-------------|-------------------------------------------------------|--------------------------------------------|------------------------------------------|-------------|
| Any comorbidity, number (%)    | 336,909 (64.5)                             | 128,590 (74.6)                    | 179,847 (61.3)                        | 28,472 (50.6)                | <0.001      | 173,828 (58.5)                                        | 123,265 (76.8)                             | 33,318 (62.3)                            | <0.001      |
| Chronic cardiovascular disease | 180,370 (34.5)                             | 72,196 (41.9)                     | 93,574 (31.9)                         | 14,600 (25.9)                | <0.001      | 89,402 (30.1)                                         | 69,768 (43.5)                              | 17,980 (33.6)                            | <0.001      |
| Chronic hematologic diseases   | 4,134 (0.8)                                | 1,687 (1.0)                       | 2,204 (0.8)                           | 243 (0.4)                    | <0.001      | 1,957 (0.7)                                           | 1,739 (1.1)                                | 365 (0.7)                                | <0.001      |
| Chronic hepatic disease        | 4,732 (0.9)                                | 2,101 (1.2)                       | 2,309 (0.8)                           | 322 (0.6)                    | <0.001      | 1,924 (0.7)                                           | 2,368 (1.5)                                | 361 (0.7)                                | <0.001      |
| Asthma                         | 14,567 (2.8)                               | 4,947 (2.9)                       | 8,639 (2.9)                           | 981 (1.7)                    | <0.001      | 9,130 (3.1)                                           | 3,634 (2.3)                                | 1,514 (2.8)                              | <0.001      |
| Diabetes                       | 134,391 (25.7)                             | 53,717 (31.2)                     | 69,078 (23.6)                         | 11,596 (20.6)                | <0.001      | 65,941 (22.2)                                         | 52,958 (33.0)                              | 12,844 (24.0)                            | <0.001      |
| Chronic neurological disease   | 21,016 (4.0)                               | 8,821 (5.1)                       | 10,832 (3.7)                          | 1,363 (2.4)                  | <0.001      | 8,113 (2.7)                                           | 10,943 (6.8)                               | 1,622 (3.0)                              | <0.001      |
| Chronic lung disease           | 20,140 (3.9)                               | 9,249 (5.4)                       | 9,483 (3.2)                           | 1,408 (2.5)                  | <0.001      | 8,222 (2.8)                                           | 10,021 (6.2)                               | 1,621 (3.0)                              | <0.001      |
| Immunodeficiency               | 13,967 (2.7)                               | 5,689 (3.3)                       | 7,376 (2.5)                           | 902 (1.6)                    | <0.001      | 6,351 (2.1)                                           | 6,283 (3.9)                                | 1,132 (2.1)                              | <0.001      |
| Chronic renal disease          | 21,725 (4.2)                               | 10,684 (6.2)                      | 9,429 (3.2)                           | 1,512 (2.9)                  | <0.001      | 8,149 (2.7)                                           | 11,491 (7.2)                               | 1,743 (3.3)                              | <0.001      |
| Obesity                        | 38,415 (7.4)                               | 18,057 (10.5)                     | 17,998 (6.1)                          | 2,360 (4.2)                  | <0.001      | 20,993 (7.1)                                          | 12,765 (8.0)                               | 4,005 (7.5)                              | <0.001      |
| Others <sup>c</sup>            | 144,081 (27.6)                             | 58,139 (33.7)                     | 74,994 (25.6)                         | 10,948 (19.4)                | <0.001      | 72,598 (24.4)                                         | 55,866 (34.8)                              | 13,042 (24.4)                            | <0.001      |
| Symptoms, number (%)           |                                            |                                   |                                       |                              |             |                                                       |                                            |                                          |             |
| Fever                          | 188,572 (64.3)                             | 104,650 (60.7)                    | 188,572 (64.3)                        | 34,789 (61.8)                | <0.001      | 194,578 (65.5)                                        | 93,933 (58.5)                              | 32,586 (60.9)                            | <0.001      |
| Cough                          | 369,192 (70.7)                             | 115,147 (66.7)                    | 215,084 (73.3)                        | 38,961 (69.2)                | <0.001      | 219,433 (73.9)                                        | 105,252 (65.6)                             | 36,717 (68.6)                            | <0.001      |
| Sore throat                    | 90,487 (17.3)                              | 23,531 (13.6)                     | 56,653 (19.3)                         | 10,303 (18.3)                | <0.001      | 56,741 (19.1)                                         | 22,982 (14.3)                              | 8,872 (16.6)                             | <0.001      |
| Shortness of breath            | 367,917 (70.5)                             | 131,799 (76.4)                    | 199,805 (68.1)                        | 36,313 (64.5)                | <0.001      | 200,051 (67.4)                                        | 124,724 (77.7)                             | 35,709 (66.7)                            | <0.001      |
| Respiratory distress syndrome  | 296,238 (56.7)                             | 107,762 (62.5)                    | 163,370 (55.7)                        | 25,106 (44.7)                | <0.001      | 157,412 (53.0)                                        | 104,555 (65.2)                             | 28,046 (52.4)                            | <0.001      |
| Oxygen saturation <95%         | 303,282 (58.1)                             | 116,355 (67.5)                    | 160,837 (54.8)                        | 26,090 (46.3)                | <0.001      | 156,349 (52.6)                                        | 111,097 (69.2)                             | 29,704 (55.5)                            | <0.001      |
| Diarrhea                       | 71,069 (13.6)                              | 20,340 (11.8)                     | 44,411 (15.1)                         | 6,318 (11.2)                 | <0.001      | 44,961 (15.1)                                         | 17,419 (10.9)                              | 7,264 (13.6)                             | <0.001      |
| Vomiting                       | 41,974 (8.0)                               | 11,950 (6.9)                      | 26,177 (8.9)                          | 3,847 (6.8)                  | <0.001      | 25,799 (8.7)                                          | 11,076 (6.9)                               | 4,156 (7.8)                              | <0.001      |
| Others <sup>d</sup>            | 179,222 (34.3)                             | 58,268 (33.8)                     | 105,646 (36.0)                        | 15,308 (27.2)                | <0.001      | 112,278 (37.8)                                        | 45,263 (28.2)                              | 18,294 (34.2)                            | <0.001      |
| Chest radiograph, number (%)   |                                            |                                   |                                       |                              | <0.001      |                                                       |                                            |                                          | <0.001      |
| Normal                         | 11,816 (2.3)                               | 3,403 (2.0)                       | 7,782 (2.7)                           | 631 (1.1)                    |             | 7,895 (2.7)                                           | 2,558 (1.6)                                | 1,091 (2.0)                              |             |
| Interstitial abnormalities     | 81,412 (15.6)                              | 28,091 (16.3)                     | 48,864 (16.7)                         | 4,457 (7.9)                  |             | 45,320 (15.3)                                         | 27,071 (16.9)                              | 7,500 (14.0)                             |             |
| Other <sup>e</sup>             | 85,870 (16.4)                              | 35,844 (20.8)                     | 47,185 (16.1)                         | 2,841 (5.1)                  |             | 246,250 (82.9)                                        | 132,429 (82.5)                             | 47,639 (89.0)                            |             |

182 <sup>a</sup> Includes 11,126 patients with unknown clinical outcome.

183 <sup>b</sup> Non-survivors are classified as those whose death was associated with COVID-19, according to the *SIVEP-Gripe* database. Those who had COVID-19 but died  
184 due to an unrelated cause are classified under "Survivor & non-COVID-19 death". Survivor N=296,002, non-COVID-19 death=1,041.

185 <sup>c</sup> Other comorbidities that were not specifically asked about in the survey, but self-reported as "other" include, but are not limited to: hypertension, cancer,  
186 anemia, bronchitis, dyslipidemia, and pulmonary emphysema.

187

1  
2  
3 188 <sup>d</sup> Other symptoms that were not specifically asked about in the surveillance form, but self-reported as “other” include, but are not limited to: loss of taste, loss of  
4 189 smell, myalgia, weakness, body ache, fatigue, exhaustion, tachypnea, and syncope.  
5 190 <sup>e</sup> Includes consolidation, mixed, and other.  
6  
7  
8  
9  
10  
11  
12  
13  
14  
15  
16  
17  
18  
19  
20  
21  
22  
23  
24  
25  
26  
27  
28  
29  
30  
31  
32  
33  
34  
35  
36  
37  
38  
39  
40  
41  
42  
43  
44  
45  
46  
47

For peer review only

1  
2  
3 191 The median time from illness onset to hospital admission was 6 days (IQR, 3-9), slightly shorter  
4  
5 192 among non-survivors, 5 days (IQR, 2-8). Mechanical ventilation was needed by 62.2% of all  
6  
7 193 patients, and by 75.6% of those who died. Invasive ventilation was more common in the ICU  
8  
9  
10 194 (44.0%). Oseltamivir, an antiviral medication, was the most common drug used during treatment  
11  
12 195 (15.8% overall, and 17.6% among those in ICU), and the median time from illness onset to  
13  
14 196 treatment was 5 days (IQR, 3-8). Of the patients that needed ICU, 51.8% died from causes  
15  
16 197 associated with COVID-19, and 19.0% remained hospitalized after ICU discharge for 5 days  
17  
18 198 (IQR, 2-10). The median time from illness onset to ICU admission was 7 days (IQR, 3-10), and  
19  
20 199 the medium length of ICU stay was 8 days (IQR, 3-15) for all patients, 9 days (IQR, 4-16) for the  
21  
22 200 deceased. Among the 160,495 patients who died of causes associated with COVID-19 by  
23  
24 201 December 14, the median time from illness onset to death was 15 days (IQR, 9-24) (table 3).  
25  
26 202 Medium length of hospital stay was 8 days (IQR, 4-17), but longer for those who needed ICU  
27  
28 203 admission, 12 days (IQR, 6-22). The density of time from hospital admission to death is  
29  
30 204 positively skewed, more so for those who did not get admitted to the ICU (figure 1c).  
31  
32 205 Kaplan Meier curves (figure 1d and online supplementary figure 2) for a period of up to 60 days  
33  
34 206 after hospital admission showed that survival curves were significantly different by age, region,  
35  
36 207 sex, ethnoracial self-classification, and ICU admission.  
37  
38  
39  
40  
41  
42  
43  
44  
45  
46  
47  
48  
49  
50  
51  
52  
53  
54  
55  
56  
57  
58  
59  
60

208 **Table 3. Treatment and outcomes of patients**

| Variable                                                 | All patients<br>(N = 522,167) <sup>a</sup> | ICU admission<br>(N = 172,473) | Non-ICU<br>admission<br>(N = 293,384) | Not reported<br>(N = 56,310) | p-value | Survivor &<br>non-COVID-<br>19 death<br>(N = 297,043) | Non-survivor<br>(N = 160,495) | Still in the<br>hospital<br>(N = 53,503) | p-value |
|----------------------------------------------------------|--------------------------------------------|--------------------------------|---------------------------------------|------------------------------|---------|-------------------------------------------------------|-------------------------------|------------------------------------------|---------|
| Treatment with drugs, number (%)                         |                                            |                                |                                       |                              | <0.001  |                                                       |                               |                                          | <0.001  |
| Oseltamivir                                              | 82,659 (15.8)                              | 30,341 (17.6)                  | 47,317 (16.1)                         | 5,001 (8.9)                  |         | 50,091 (16.9)                                         | 27,192 (16.9)                 | 4,242 (7.9)                              |         |
| Zanamivir                                                | 492 (0.1)                                  | 152 (0.1)                      | 303 (0.1)                             | 37 (0.1)                     |         | 298 (0.1)                                             | 128 (0.1)                     | 56 (0.1)                                 |         |
| Other                                                    | 5,008 (1.0)                                | 1,480 (0.9)                    | 3,243 (1.1)                           | 285 (0.5)                    |         | 3,029 (1.0)                                           | 1,118 (0.7)                   | 701 (1.3)                                |         |
| Mechanical ventilation, number (%)                       |                                            |                                |                                       |                              | <0.001  |                                                       |                               |                                          | <0.001  |
| Invasive                                                 | 90,189 (17.3)                              | 75,915 (44.0)                  | 12,019 (4.1)                          | 2,255 (4.0)                  |         | 17,263 (5.8)                                          | 66,652 (41.5)                 | 5,238 (9.8)                              |         |
| Noninvasive                                              | 234,554 (44.9)                             | 65,281 (37.9)                  | 157,913 (53.8)                        | 11,360 (20.2)                |         | 148,930 (50.1)                                        | 54,652 (34.1)                 | 25,925 (48.5)                            |         |
| ICU admission, number (%)                                | 172,473 (33.0)                             | 172,473 (100.0)                | -                                     | -                            |         | 65,102 (21.9)                                         | 89,264 (55.6)                 | 15,614 (29.2)                            | <0.001  |
| Remained hospitalized after ICU<br>discharge, number (%) | 32,770 (19.0)                              | 32,770 (19.0)                  | -                                     | -                            |         | 27,775 (42.7)                                         | 3,243 (3.6)                   | 1,303 (8.4)                              | <0.001  |
| Median length (IQR), days                                | 5 (2-10)                                   | 5 (2-10)                       | -                                     | -                            |         | 5 (2-9)                                               | 7 (2-16)                      | 72 (21-139)                              | <0.001  |
| Median times (IQR), days                                 |                                            |                                |                                       |                              |         |                                                       |                               |                                          |         |
| Illness onset to treatment with drugs                    | 5 (3-8)                                    | 5 (3-8)                        | 6 (3-9)                               | 6 (3-8)                      | <0.001  | 6 (3-9)                                               | 5 (2-8)                       | 6 (3-9)                                  | <0.001  |
| Illness onset to hospitalization                         | 6 (3-9)                                    | 6 (3-9)                        | 6 (3-10)                              | 6 (2-9)                      | <0.001  | 7 (3-10)                                              | 5 (2-8)                       | 6 (3-10)                                 | <0.001  |
| Illness onset to ICU admission                           | 7 (3-10)                                   | 7 (3-10)                       | -                                     | -                            |         | 7 (4-10)                                              | 6 (3-10)                      | 7 (3-10)                                 | <0.001  |
| Hospital admission to ICU admission                      | 0 (0-1)                                    | 0 (0-1)                        | -                                     | -                            |         | 0 (0-1)                                               | 0 (0-1)                       | 0 (0-0)                                  | <0.001  |
| Illness onset to death                                   | 15 (9-24)                                  | 17 (10-25)                     | 13 (7-21)                             | 12 (7-20)                    | <0.001  | -                                                     | 15 (9-24)                     | -                                        | -       |
| Illness onset to hospital discharge                      | 15 (11-20)                                 | 18 (13-27)                     | 14 (10-18)                            | 16 (11-21)                   | <0.001  | 15 (11-20)                                            | -                             | -                                        | -       |
| Hospital admission to death                              | 9 (4-16)                                   | 10 (5-18)                      | 7 (2-14)                              | 5 (1-13)                     | <0.001  | -                                                     | 9 (4-16)                      | -                                        | -       |
| Hospital admission to ICU discharge                      | 9 (4-17)                                   | 9 (4-17)                       | -                                     | -                            |         | 7 (4-14)                                              | 10 (5-10)                     | 6 (2-14)                                 | <0.001  |
| ICU admission to death                                   | 9 (4-16)                                   | 9 (4-16)                       | -                                     | -                            |         | -                                                     | 9 (4-16)                      | -                                        | -       |
| Median length hospital stay (IQR),<br>days               | 8 (4-17)                                   | 12 (6-22)                      | 7 (4-13)                              | 8 (3-18)                     | <0.001  | 7 (4-12)                                              | 9 (4-16)                      | 79 (23-157)                              | <0.001  |
| Median length ICU stay (IQR), days                       | 8 (3-15)                                   | 8 (3-15)                       | -                                     | -                            |         | 6 (3-12)                                              | 9 (4-16)                      | 4 (2-11)                                 | <0.001  |
| Clinical outcomes as of 12/14/2020,<br>number (%)        |                                            |                                |                                       |                              | <0.001  |                                                       |                               |                                          | -       |
| Cured and discharged from hospital                       | 296,002 (56.7)                             | 64,578 (37.4)                  | 202,042 (68.9)                        | 29,382 (52.2)                |         | 296,002 (99.7)                                        | -                             | -                                        |         |
| Death due to other causes                                | 1,041 (0.2)                                | 524 (0.3)                      | 443 (0.2)                             | 74 (0.1)                     |         | 1,041 (0.4)                                           | -                             | -                                        |         |
| Death associated with COVID-19                           | 160,495 (30.7)                             | 89,264 (51.8)                  | 53,282 (18.2)                         | 17,949 (31.9)                |         | -                                                     | 160,495 (100.0)               | -                                        |         |
| Still in the hospital                                    | 53,503 (10.3)                              | 15,614 (9.1)                   | 30,963 (10.6)                         | 6,926 (12.3)                 |         | -                                                     | -                             | 53,503 (100.0)                           |         |

209 <sup>a</sup> Includes 11,126 patients with unknown clinical outcome.210 <sup>b</sup> Non-survivors are classified as those whose death was associated with COVID-19, according to the *SIVEP-Gripe* database. Those who had COVID-19 but died  
211 due to an unrelated cause are classified under "Survivor & non-COVID-19 death". Survivor N=296,002, non-COVID-19 death=1,041.



1  
2  
3 212 Univariable logistic analysis indicated that the odds of in-hospital death progressively increased  
4  
5 213 with age, and were higher for patients who were male, non-white, from the North and Northeast  
6  
7 214 regions, needed ICU care, were obese, and had diabetes and other comorbidities (table 4). The  
8  
9 215 multivariable analysis included 168,936 records (65,670 non-survivors) that had no missing data  
10  
11 216 for covariates. The odds of in-hospital death for males are 1.23 times that of females, and for  
12  
13 217 those in the North and Northeast regions were, respectively, 1.83 and 1.48 times that of patients  
14  
15 218 in the Southeast. The Cox proportional-hazards model included 176,559 records (64,809 non-  
16  
17 219 survivors). Variables associated with in-hospital death were age, sex, ethnoracial self-  
18  
19 220 classification, region, ICU care, and various co-morbidities. Age, however, had the highest  
20  
21 221 hazard ratios, ranging from 1.67 (95% CI: 1.49-1.89) for those aged 20-39, to 5.51 (95% CI:  
22  
23 222 4.91-6.18) for those 80 or older, compared to patients younger than 20 years (table 4).  
24  
25  
26  
27  
28  
29  
30  
31  
32  
33  
34  
35  
36  
37  
38  
39  
40  
41  
42  
43  
44  
45  
46  
47  
48  
49  
50  
51  
52  
53  
54  
55  
56  
57  
58  
59  
60

view only

224 **Table 4: Odds ratios (OR) and hazard ratios (HR) for death among hospitalized patients with confirmed**  
 225 **COVID-19**  
 226

| Variables                                         | Univariable OR <sup>a</sup><br>(95% CI) | p-value <sup>b</sup> | Multivariable OR<br>(95% CI)<br>N = 168,936 | p-value <sup>b</sup> | HR (95% CI) for<br>death within 60<br>days of<br>hospitalization<br>N = 176,559 |
|---------------------------------------------------|-----------------------------------------|----------------------|---------------------------------------------|----------------------|---------------------------------------------------------------------------------|
| Age (reference 0-19)                              |                                         |                      |                                             |                      |                                                                                 |
| 20-39                                             | 1.35 (1.26, 1.46)                       | < 0.001              | 1.66 (1.45, 1.91)                           | < 0.001              | 1.67 (1.48, 1.89)                                                               |
| 40-59                                             | 2.94 (2.74, 3.15)                       | < 0.001              | 2.70 (2.37, 3.09)                           | < 0.001              | 2.21 (1.97, 2.48)                                                               |
| 60-69                                             | 6.76 (6.30, 7.26)                       | < 0.001              | 5.15 (4.52, 5.88)                           | < 0.001              | 3.05 (2.72, 3.43)                                                               |
| 70-79                                             | 11.05 (10.30, 11.86)                    | < 0.001              | 8.24 (7.24, 9.42)                           | < 0.001              | 3.90 (3.48, 4.38)                                                               |
| ≥ 80                                              | 17.58 (16.37, 18.88)                    | < 0.001              | 14.52 (12.74, 16.59)                        | < 0.001              | 5.51 (4.91, 6.18)                                                               |
| Sex (reference Female)                            |                                         |                      |                                             |                      |                                                                                 |
| Male                                              | 1.10 (1.09, 1.11)                       | < 0.001              | 1.23 (1.20, 1.26)                           | < 0.001              | 1.09 (1.07, 1.10)                                                               |
| Ethnoracial self-classification (reference White) |                                         |                      |                                             |                      |                                                                                 |
| Black/Brown                                       | 1.25 (1.24, 1.27)                       | < 0.001              | 1.18 (1.15, 1.22)                           | < 0.001              | 1.08 (1.06, 1.10)                                                               |
| Other                                             | 1.18 (1.12, 1.25)                       | < 0.001              | 1.05 (0.95, 1.16)                           | 0.309                | 1.02 (0.96, 1.10)                                                               |
| Not reported                                      | 0.9 (0.89, 0.92)                        | < 0.001              | 0.77 (0.74, 0.80)                           | < 0.001              | 0.79 (0.77, 0.81)                                                               |
| Region (reference Southeast)                      |                                         |                      |                                             |                      |                                                                                 |
| South                                             | 0.85 (0.83, 0.87)                       | < 0.001              | 0.89 (0.87, 0.92)                           | < 0.001              | 0.91 (0.89, 0.93)                                                               |
| Center-West                                       | 0.96 (0.94, 0.98)                       | < 0.001              | 1.04 (1.00, 1.08)                           | 0.049                | 1.00 (0.97, 1.03)                                                               |
| North                                             | 1.31 (1.28, 1.34)                       | < 0.001              | 1.83 (1.75, 1.92)                           | < 0.001              | 1.34 (1.30, 1.39)                                                               |
| Northeast                                         | 1.61 (1.58, 1.64)                       | < 0.001              | 1.48 (1.43, 1.55)                           | < 0.001              | 1.10 (1.07, 1.12)                                                               |
| ICU                                               | 5.21 (5.14, 5.28)                       | < 0.001              | 5.20 (5.08, 5.32)                           | < 0.001              | 1.78 (1.75, 1.81)                                                               |
| Obesity                                           | 0.91 (0.88, 0.93)                       | < 0.001              | 1.23 (1.18, 1.27)                           | < 0.001              | 1.07 (1.04, 1.10)                                                               |
| Diabetes                                          | 1.32 (1.30, 1.35)                       | < 0.001              | 1.18 (1.15, 1.21)                           | < 0.001              | 1.08 (1.07, 1.10)                                                               |
| Asthma                                            | 0.59 (0.56, 0.61)                       | < 0.001              | 0.81 (0.77, 0.86)                           | < 0.001              | 0.88 (0.84, 0.92)                                                               |
| Chronic liver disease                             | 1.87 (1.76, 1.99)                       | < 0.001              | 1.74 (1.59, 1.90)                           | < 0.001              | 1.33 (1.26, 1.40)                                                               |
| Chronic neurological disease                      | 2.12 (2.06, 2.19)                       | < 0.001              | 1.65 (1.58, 1.73)                           | < 0.001              | 1.18 (1.15, 1.21)                                                               |
| Chronic lung disease                              | 1.92 (1.86, 1.99)                       | < 0.001              | 1.46 (1.40, 1.53)                           | < 0.001              | 1.16 (1.13, 1.19)                                                               |
| Immunodeficiency                                  | 1.53 (1.47, 1.58)                       | < 0.001              | 1.93 (1.83, 2.04)                           | < 0.001              | 1.26 (1.22, 1.31)                                                               |
| Chronic kidney disease                            | 2.23 (2.16, 2.30)                       | < 0.001              | 1.70 (1.63, 1.78)                           | < 0.001              | 1.17 (1.14, 1.21)                                                               |

227 <sup>a</sup> The N varies for univariable OR, depending on the number of missing values for each variable.

228 <sup>b</sup> P-value from Wald test.

## 229 CONCLUSION

230 This study described demographic, clinical, and radiographic characteristics, treatment, case  
231 outcome, and risk factors associated with in-hospital death of 522,167 patients hospitalized with  
232 confirmed COVID-19 in Brazil. Results show that 56.7% were discharged, 0.002% died of other  
233 causes, 30.7% died of causes associated with COVID-19, and 10.2% remained in the hospital as  
234 of December 14. Patients were mostly older than 40 years, predominantly from the Southeast  
235 region, with about one fourth needing to travel to a different municipality for hospitalization. At  
236 least one comorbidity was present in 64.5% of patients and in 76.8% of the non-survivors. From  
237 illness onset, the median time to hospital and ICU admission was 6 and 7 days, respectively; 15  
238 days to death (17 to those admitted to the ICU), and 15 days to hospital discharge (18 days to  
239 those admitted to the ICU). Risk factors for in-hospital death were older age, being male, of  
240 Black/Brown ethnoracial self-classification, living in the North or Northeast regions, with a  
241 history of ICU admission, and various co-morbidities.

242 Our results can be analyzed in light of findings from other countries. The use of mechanical  
243 ventilation was higher in Brazil (62.2% among all patients, 75.6% of the non-survivors)  
244 compared to patterns described for China (ranging from 17.2 to 38.7% of patients),<sup>8-10</sup> and  
245 Germany (17% of patients),<sup>11</sup> but lower than Italy (81.7% of all patients).<sup>12</sup> While ICU mortality  
246 in Italy was 26%,<sup>12</sup> in Brazil it was 51.8%. In Brazil, 33.0% of hospitalized patients were  
247 admitted to the ICU, against 16% in Italy,<sup>13</sup> and 19% in France.<sup>14</sup> In-hospital death was observed  
248 in 18.1% of patients in France,<sup>14</sup> 22% in Germany,<sup>11</sup> and 30.7% in Brazil. The time from illness  
249 onset to hospitalization in China<sup>9</sup> was 11 days (IQR, 8-14), but much shorter in Brazil, 6 days  
250 (IQR, 3-9). The length of hospital stay, however, was about 4 days longer in China.<sup>9</sup><sup>15</sup> These  
251 comparisons need to be taken with caution. First, studies from China had a smaller sample size,

1  
2  
3 252 and regional variability is very large, as reported for France.<sup>14</sup> In Brazil, for example, in-hospital  
4  
5 253 death varied from 25.9% in the South region to 36.4% in the Northeast, and ICU mortality from  
6  
7 254 48.0% in the Southeast to 66.5% in the North. The time from illness to hospitalization was also  
8  
9 255 longer in the North and Center-West regions, 7 days (IQR, 4-10).

10 256 Our results confirm previous findings regarding symptoms and comorbidities. Hypertension, a  
11  
12 257 very common comorbidity in China<sup>9</sup> could not be measured from our data, but over one-third of  
13  
14 258 the adult population in Brazil has that condition.<sup>16</sup> In Brazil, 35.5% of the patients reported no  
15  
16 259 comorbidities, while in New York City this number was 6.1%,<sup>17</sup> and in China it was 52%.<sup>9</sup>  
17  
18 260 Diabetes was reported in 19% of patients in China,<sup>9</sup> 33.8% in New York City,<sup>17</sup> and 25.7% in  
19  
20 261 Brazil. Part of these differences reflects the disease burden in each locality, but also the lack of  
21  
22 262 standardized data collection (e.g., conditions systematically collected in one country and only  
23  
24 263 reported in the 'other' category in another country).

25  
26 264 The observed associations of age, sex, obesity, and diabetes with in-hospital death corroborate  
27  
28 265 previous findings.<sup>5 6 14</sup> The higher risk among non-white patients was previously reported in  
29  
30 266 Brazil, the UK, and the US.<sup>18-22</sup> In Brazil, this reflects structural inequalities that made large  
31  
32 267 fractions of the population more vulnerable to COVID-19 (e.g., people living in areas with  
33  
34 268 precarious infrastructure, overcrowded households, regions with low supply of physicians and  
35  
36 269 hospital services, and who depend on informal labor).<sup>23 24</sup> Those inequalities are also captured by  
37  
38 270 a higher hazard ratio in the North and Northeast regions, where Brazil consistently reports worse  
39  
40 271 socioeconomic indicators.<sup>25</sup> Currently, the North region has the lowest rates of hospital beds,  
41  
42 272 ICU beds, and physicians per person.<sup>26</sup> Indeed, the region had the worst indicators in terms of  
43  
44 273 mortality and time to hospitalization, and patients who were hospitalized in a municipality  
45  
46 274 different from the one where they live had to travel 122.0 km (IQR, 58.3-258.6) while those in

1  
2  
3 275 the Southeast traveled 22.3 km (IQR, 16.1-36.3). Hospitalization in a different municipality  
4  
5 276 occurs when the place of residence has no hospitals, has no available hospital beds, or when the  
6  
7 277 closest hospital is actually outside the municipality of residence. In Brazil, the size of  
8  
9 278 municipalities varies widely: 23% have 5,000 residents or less, and 5% have 100,000 or more  
10  
11 279 residents. Of the 5,570 municipalities, 37% and 75% have no hospitals and no ICU care,  
12  
13 280 respectively. A regionalization process guarantees that all the population has access to hospital  
14  
15 281 care.<sup>27</sup> However, when hospitals reach capacity, as was observed in several cities in Brazil in late  
16  
17 282 April and May, municipalities without hospitals and ICU units are unable to provide proper care,  
18  
19 283 which may have contributed to higher COVID-19 mortality. Therefore, risk factors for in-  
20  
21 284 hospital mortality due to COVID-19 expose local and structural inequalities.

22  
23  
24  
25 285 This study has some limitations. First, we used administrative records captured in structured  
26  
27 286 surveillance forms. Those lack details available in hospital medical records and may have  
28  
29 287 accuracy and completeness problems. In addition, it limits the types of comorbidities and  
30  
31 288 symptoms reported, as those listed under the 'other' category were not systematically collected  
32  
33 289 from all cases (e.g., loss of taste and smell). Second, we did not have access to laboratory results  
34  
35 290 other than COVID-19 tests (e.g., complete blood count). While this does not change any of our  
36  
37 291 results, they would allow for a better characterization of the clinical course of the disease. Third,  
38  
39 292 23.1% of patients did not report information on ethnoracial self-classification, 10.8% did not  
40  
41 293 have information on ICU admission, and for 2.1% there was no information on clinical outcome.  
42  
43 294 This is not uncommon in the analysis of administrative records.<sup>22</sup> Here we report all records and  
44  
45 295 included an additional category (ethnoracial self-classification not reported) in the risk factor  
46  
47 296 analysis.

1  
2  
3 297 Despite these limitations, this study provides a comprehensive description of characteristics,  
4  
5 298 outcomes, and risk factors for mortality of patients hospitalized with COVID-19 in Brazil, and  
6  
7 299 the largest cohort of patients so far analyzed (N=522,167). Results shed light on commonalities  
8  
9  
10 300 and differences between Brazil and other countries affected by COVID-19, and highlight  
11  
12 301 inequalities in disease outcomes. Most importantly, our results could be used to inform  
13  
14 302 coordinated actions to target those who currently bear the highest morbidity and mortality  
15  
16 303 burden. Currently, Brazil's response to COVID-19 did not comprehensively and effectively  
17  
18 304 utilize its community-based primary health care program.<sup>28-30</sup> Brazil has a network of almost  
19  
20 305 270,000 community health workers that reach out to about 70% of the Brazilian population.  
21  
22 306 These agents could actively identify vulnerable people who face higher risk of mortality, could  
23  
24 307 act as agents of information to sensitize the population and boost adherence to control measures  
25  
26 308 (e.g., use of masks), and could continue to deliver community-based primary care services that  
27  
28 309 have been, for the most part, interrupted by the pandemic. These agents will also be important to  
29  
30 310 support the delivery of vaccination (once it starts) to the most vulnerable. Currently, with more  
31  
32 311 than 200,000 deaths and with hospital occupancy increasing at alarming rates, leveraging and  
33  
34 312 strengthening the existing network of primary health care is paramount to contain the sustained  
35  
36 313 and unequal burden of COVID-19 in Brazil.  
37  
38  
39  
40  
41  
42  
43  
44

45 315 **Contributors:** MCC and GVAF conceived the study, were responsible for data analysis and  
46  
47 316 interpretation. MCC wrote the manuscript. GVAF and EMM acquired the data. GVAF and SG  
48  
49 317 were responsible for data curation. SG ran the statistical models and contributed to writing. All  
50  
51 318 authors edited and approved the final version of the manuscript.  
52  
53  
54  
55  
56  
57  
58  
59  
60

1  
2  
3 319 **Funding:** This research received no specific grant from any funding agency in the public,  
4  
5 320 commercial or not-for-profit sectors.  
6  
7

8  
9 321 **Data availability statement:** The *SIVEP-Gripe* dataset is publicly available on the Ministry of  
10  
11 322 Health's DATASUS website (<https://opendatasus.saude.gov.br/nl/dataset>).  
12

13  
14 323 **Acknowledgements:** We would like to thank Nicholas Arisco, M.S., for technical assistance.  
15

16 324

17  
18 325 **Figure 1: Age distribution of patients, density curves of length of time from hospital**  
19  
20 326 **admission to death, and survival curve 60 days after hospital admission.** (a) Age distribution  
21 327 of patients hospitalized. (b) Age distribution of in-hospital deaths. (c) Density of number of days  
22  
23 328 from hospital admission to death up to 60 days after hospital admission, detailed by ICU  
24  
25 329 admission status. (d) Survival curve estimated with Kaplan Meier and considering 60 days from  
26  
27 330 hospital admission.  
28  
29  
30  
31  
32  
33  
34  
35  
36  
37  
38  
39  
40  
41  
42  
43  
44  
45  
46  
47  
48  
49  
50  
51  
52  
53  
54  
55  
56  
57  
58  
59  
60

1  
2  
3  
4 331 **References**  
5  
6

- 7 332 1. World Health Organization. Coronavirus disease (COVID-19) outbreak situation:  
8  
9 333 <https://www.who.int/emergencies/diseases/novel-coronavirus-2019>, 2020.  
10  
11  
12 334 2. Brasil, Ministério da Saúde. A experiência brasileira em sistemas de informação em saúde.  
13  
14 335 Série B Textos Básicos de Saúde. Brasília: Ministério da Saúde, Organização Pan-Americana  
15  
16 336 da Saúde, Fundação Oswaldo Cruz. Available at:  
17  
18 337 [http://bvsmis.saude.gov.br/bvsmis/publicacoes/experiencia\\_brasileira\\_sistemas\\_saude\\_volume2.p](http://bvsmis.saude.gov.br/bvsmis/publicacoes/experiencia_brasileira_sistemas_saude_volume2.pdf)  
19  
20 338 [df](http://bvsmis.saude.gov.br/bvsmis/publicacoes/experiencia_brasileira_sistemas_saude_volume2.pdf), 2009.  
21  
22  
23 339 3. Lima-Costa MF, Rodrigues LC, Barreto ML, et al. Genomic ancestry and ethnoracial self-  
24  
25 340 classification based on 5,871 community-dwelling Brazilians (The Epigen Initiative).  
26  
27 341 *Scientific Reports* 2015;5(1):9812. doi: 10.1038/srep09812  
28  
29  
30 342 4. Brasil, Ministério da Saúde. Guia de Vigilância Epidemiológica. Emergência de Saúde Pública  
31  
32 343 de Importância Nacional pela Doença pelo Coronavírus 2019. Vigilância de Síndromes  
33  
34 344 Respiratórias Agudas COVID-19. August 5, 2020 ed: Ministério da Saúde.  
35  
36 345 [https://portalarquivos.saude.gov.br/images/af\\_gvs\\_coronavirus\\_6ago20\\_ajustes-finais-2.pdf](https://portalarquivos.saude.gov.br/images/af_gvs_coronavirus_6ago20_ajustes-finais-2.pdf),  
37  
38 346 2020.  
39  
40  
41  
42 347 5. Zheng Z, Peng F, Xu B, et al. Risk factors of critical & mortal COVID-19 cases: A systematic  
43  
44 348 literature review and meta-analysis. *J Infect* 2020:S0163-4453(20)30234-6. doi:  
45  
46 349 10.1016/j.jinf.2020.04.021  
47  
48  
49 350 6. Li X, Xu S, Yu M, et al. Risk factors for severity and mortality in adult COVID-19 inpatients  
50  
51 351 in Wuhan. *Journal of Allergy and Clinical Immunology* 2020;146(1):110-18. doi:  
52  
53 352 <https://doi.org/10.1016/j.jaci.2020.04.006>  
54  
55  
56  
57  
58  
59  
60



- 1  
2  
3 353 7. Esai Selvan M. Risk factors for death from COVID-19. *Nature Reviews Immunology* 2020  
4  
5 354 doi: 10.1038/s41577-020-0351-0  
6  
7  
8 355 8. Chen N, Zhou M, Dong X, et al. Epidemiological and clinical characteristics of 99 cases of  
9  
10 356 2019 novel coronavirus pneumonia in Wuhan, China: a descriptive study. *Lancet*  
11  
12 357 2020;395(10223):507-13. doi: 10.1016/s0140-6736(20)30211-7 [published Online First:  
13  
14 358 2020/02/03]  
15  
16  
17 359 9. Zhou F, Yu T, Du R, et al. Clinical course and risk factors for mortality of adult inpatients  
18  
19 360 with COVID-19 in Wuhan, China: a retrospective cohort study. *The Lancet* 2020 doi:  
20  
21 361 10.1016/S0140-6736(20)30566-3  
22  
23  
24 362 10. Lai CC, Liu YH, Wang CY, et al. Asymptomatic carrier state, acute respiratory disease, and  
25  
26 363 pneumonia due to severe acute respiratory syndrome coronavirus 2 (SARS-CoV-2): Facts and  
27  
28 364 myths. *J Microbiol Immunol Infect* 2020;53(3):404-12. doi: 10.1016/j.jmii.2020.02.012  
29  
30 365 [published Online First: 2020/03/17]  
31  
32  
33 366 11. Karagiannidis C, Mostert C, Hentschker C, et al. Case characteristics, resource use, and  
34  
35 367 outcomes of 10021 patients with COVID-19 admitted to 920 German hospitals: an  
36  
37 368 observational study. *The Lancet Respiratory Medicine* 2020 doi: 10.1016/S2213-  
38  
39 369 2600(20)30316-7  
40  
41  
42 370 12. Grasselli G, Zangrillo A, Zanella A, et al. Baseline Characteristics and Outcomes of 1591  
43  
44 371 Patients Infected With SARS-CoV-2 Admitted to ICUs of the Lombardy Region, Italy. *Jama*  
45  
46 372 2020;323(16):1574-81. doi: 10.1001/jama.2020.5394 [published Online First: 2020/04/07]  
47  
48  
49 373 13. Grasselli G, Pesenti A, Cecconi M. Critical Care Utilization for the COVID-19 Outbreak in  
50  
51 374 Lombardy, Italy: Early Experience and Forecast During an Emergency Response. *JAMA* 2020  
52  
53 375 doi: 10.1001/jama.2020.4031  
54  
55  
56  
57  
58  
59

- 1  
2  
3 376 14. Salje H, Tran Kiem C, Lefrancq N, et al. Estimating the burden of SARS-CoV-2 in France.  
4  
5 377 *Science* 2020;369(6500):208-11. doi: 10.1126/science.abc3517  
6  
7  
8 378 15. Guan W-j, Ni Z-y, Hu Y, et al. Clinical Characteristics of Coronavirus Disease 2019 in  
9  
10 379 China. *New England Journal of Medicine* 2020 doi: 10.1056/NEJMoa2002032  
11  
12 380 16. Macinko J, Leventhal DGP, Lima-Costa MF. Primary Care and the Hypertension Care  
13  
14 381 Continuum in Brazil. *Journal of Ambulatory Care Management* 2018;41(1):34-46. doi:  
15  
16 382 10.1097/JAC.0000000000000222  
17  
18  
19 383 17. Richardson S, Hirsch JS, Narasimhan M, et al. Presenting Characteristics, Comorbidities, and  
20  
21 384 Outcomes Among 5700 Patients Hospitalized With COVID-19 in the New York City Area.  
22  
23 385 *JAMA* 2020;323(20):2052-59. doi: 10.1001/jama.2020.6775  
24  
25  
26 386 18. Baqui P, Bica I, Marra V, et al. Ethnic and regional variations in hospital mortality from  
27  
28 387 COVID-19 in Brazil: a cross-sectional observational study. *The Lancet Global Health*  
29  
30 388 2020;Published: July 02, 2020 doi: 10.1016/S2214-109X(20)30285-0  
31  
32  
33 389 19. Price-Haywood EG, Burton J, Fort D, et al. Hospitalization and Mortality among Black  
34  
35 390 Patients and White Patients with Covid-19. *New England Journal of Medicine*  
36  
37 391 2020;382(26):2534-43. doi: 10.1056/NEJMsa2011686  
38  
39  
40 392 20. Cordes J, Castro MC. Spatial analysis of COVID-19 clusters and contextual factors in New  
41  
42 393 York City. *Spatial and Spatio-temporal Epidemiology* 2020;34:100355. doi:  
43  
44 394 <https://doi.org/10.1016/j.sste.2020.100355>  
45  
46  
47 395 21. Golestaneh L, Neugarten J, Fisher M, et al. The association of race and COVID-19 mortality.  
48  
49 396 *EClinicalMedicine* 2020;Published: July 14, 2020 doi: 10.1016/j.eclinm.2020.100455  
50  
51  
52  
53  
54  
55  
56  
57  
58  
59  
60

- 1  
2  
3 397 22. Williamson E, Walker AJ, Bhaskaran KJ, et al. OpenSAFELY: factors associated with  
4  
5 398 COVID-19-related hospital death in the linked electronic health records of 17 million adult  
6  
7 399 NHS patients. *medRxiv* 2020:2020.05.06.20092999. doi: 10.1101/2020.05.06.20092999  
9  
10 400 23. Castro MC, Resende de Carvalho L, Chin T, et al. Demand for hospitalization services for  
11  
12 401 COVID-19 patients in Brazil. *medRxiv* 2020:2020.03.30.20047662. doi:  
13  
14 402 10.1101/2020.03.30.20047662  
16  
17 403 24. Sousa Júnior WCd, Gonçalves DA, Cruz DB. COVID-19: Local/regional inequalities and  
18  
19 404 impacts over critical healthcare infrastructure in Brazil. *Ambiente & Sociedade* 2020;23  
20  
21 405 25. Menezes Filho N, Kirschbaum C. Education and Inequality in Brazil. In: Arretche M, ed.  
22  
23 406 Paths of Inequality in Brazil: A Half-Century of Changes. Cham: Springer International  
24  
25 407 Publishing 2019:69-88.  
26  
27 408 26. Carvalho LR, Andrade MV, Amaral PVM. Avaliação dos parâmetros de oferta mínimos para  
28  
29 409 os leitos SUS no Brasil, 2015. *Planejamento e Políticas Públicas - PPP/Ipea* 2020;In Press  
30  
31 410 27. Castro MC, Massuda A, Almeida G, et al. Brazil's unified health system: the first 30 years  
32  
33 411 and prospects for the future. *Lancet* 2019;394(10195):345-56. doi: 10.1016/s0140-  
34  
35 412 6736(19)31243-7 [published Online First: 2019/07/16]  
36  
37 413 28. Avelar e Silva RN, Russo G, Matijasevich A, et al. Covid-19 in Brazil has exposed socio-  
38  
39 414 economic inequalities and underfunding of its public health system. *BMJ Opinion* 2020;June  
40  
41 415 19  
42  
43 416 29. Daumas RP, Silva GAe, Tasca R, et al. O papel da atenção primária na rede de atenção à  
44  
45 417 saúde no Brasil: limites e possibilidades no enfrentamento da COVID-19. *Cadernos de Saúde*  
46  
47 418 *Pública* 2020;36  
48  
49  
50  
51  
52  
53  
54  
55  
56  
57  
58  
59  
60

- 1  
2  
3 419 30. Lotta G, Wenham C, Nunes J, et al. Community health workers reveal COVID-19 disaster in  
4  
5 420 Brazil. *Lancet* 2020 doi: 10.1016/s0140-6736(20)31521-x [published Online First:  
6  
7 421 2020/07/14]  
8  
9  
10 422  
11  
12  
13  
14  
15  
16  
17  
18  
19  
20  
21  
22  
23  
24  
25  
26  
27  
28  
29  
30  
31  
32  
33  
34  
35  
36  
37  
38  
39  
40  
41  
42  
43  
44  
45  
46  
47  
48  
49  
50  
51  
52  
53  
54  
55  
56  
57  
58  
59  
60

(a)

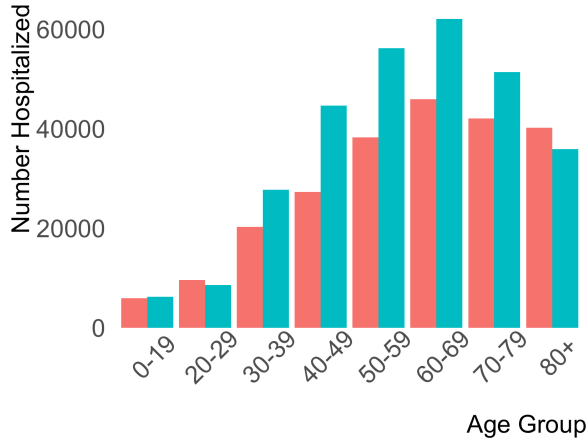

(b)

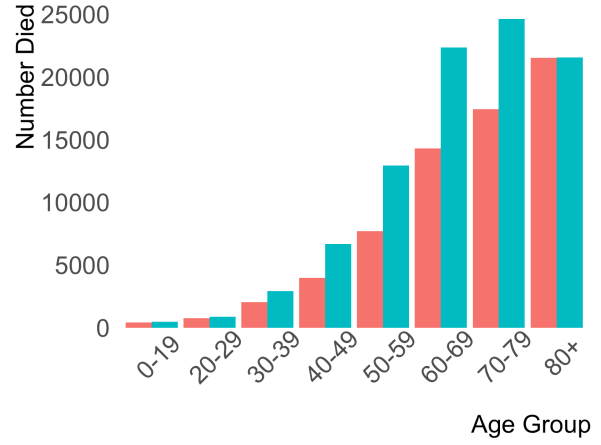

Female Male

(c)

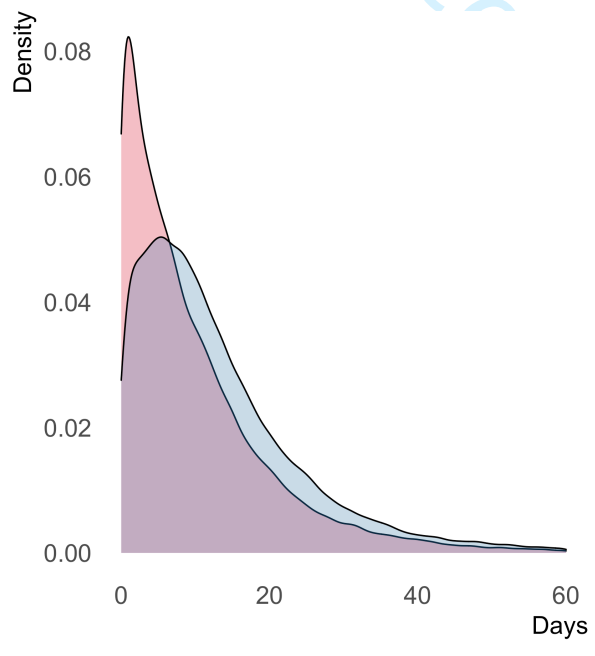

ICU No Yes

(d)

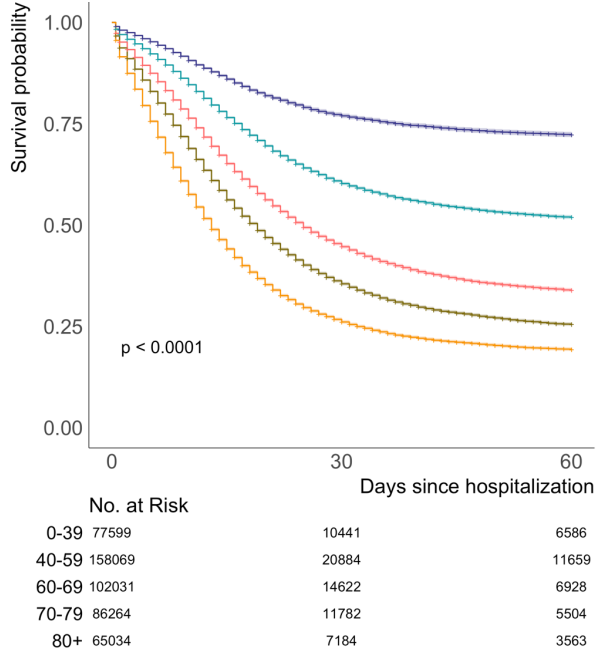

Age Groups 0-39 40-59 60-69 70-79 80+

1  
2  
3  
4  
5  
6  
7 **Supplementary material for “Characteristics, outcomes and risk factors for mortality of 522,167**  
8 **patients hospitalized with COVID-19 in Brazil: a retrospective cohort study”**  
9

10  
11  
12  
13  
14  
15  
16  
17  
18  
19  
20  
21  
22  
23  
24  
25  
26  
27  
28  
29  
30  
31  
32  
33  
34  
35  
36  
37  
38  
39  
40  
41  
42  
43  
44  
45  
46  
47  
48  
49  
50  
51  
52  
53  
54  
55  
56  
57  
58  
59  
60

For peer review only

**Supplementary Table 1: Data completeness in the dataset of hospitalized individuals with confirmed COVID-19 from SIVEP-Gripe data (as of December 14, 2020)**

| Variable                                               | Missing | N       | % Complete |
|--------------------------------------------------------|---------|---------|------------|
| Hospitalization                                        | 0       | 522,167 | 100%       |
| Final diagnosis of the case                            | 0       | 522,167 | 100%       |
| Age informed by patient                                | 0       | 522,167 | 100%       |
| Type of age (day, month, year)                         | 0       | 522,167 | 100%       |
| Sex                                                    | 84      | 522,167 | 100%       |
| Gestational age                                        | 26,081  | 299,513 | 91%        |
| Puerperal <sup>a</sup>                                 | 133,695 | 299,513 | 55%        |
| Ethnoracial self-classification                        | 120,799 | 522,167 | 77%        |
| Federal unit of residence                              | 0       | 522,167 | 100%       |
| Municipality of residence <sup>b</sup>                 | 36      | 522,167 | 100%       |
| Municipality of notification                           | 0       | 522,167 | 100%       |
| Comorbidities <sup>a</sup>                             |         |         |            |
| Chronic cardiovascular disease                         | 246,121 | 522,167 | 53%        |
| Chronic hematologic diseases                           | 314,925 | 522,167 | 40%        |
| Chronic hepatic disease                                | 315,473 | 522,167 | 40%        |
| Asthma                                                 | 311,743 | 522,167 | 40%        |
| Diabetes                                               | 264,470 | 522,167 | 49%        |
| Chronic neurological disease                           | 309,103 | 522,167 | 41%        |
| Chronic lung disease                                   | 309,631 | 522,167 | 41%        |
| Immunodeficiency                                       | 312,874 | 522,167 | 40%        |
| Chronic renal disease                                  | 309,780 | 522,167 | 41%        |
| Obesity                                                | 306,964 | 522,167 | 41%        |
| Other comorbidities                                    | 272,160 | 522,167 | 48%        |
| Symptoms <sup>a</sup>                                  |         |         |            |
| Fever                                                  | 65,355  | 522,167 | 87%        |
| Cough                                                  | 56,324  | 522,167 | 89%        |
| Sore throat                                            | 140,061 | 522,167 | 73%        |
| Shortness of breath                                    | 56,843  | 522,167 | 89%        |
| Respiratory distress syndrome                          | 90,093  | 522,167 | 83%        |
| Other symptoms descriptive                             | 272,160 | 522,167 | 48%        |
| Chest radiograph result                                | 222,990 | 522,167 | 57%        |
| Type of drug treatment <sup>a</sup>                    | 434,008 | 522,167 | 17%        |
| Mechanical ventilation                                 | 75,907  | 522,167 | 85%        |
| ICU admission                                          | 56,310  | 522,167 | 89%        |
| Date of ICU discharge <sup>c</sup>                     | 46,919  | 522,167 | 91%        |
| Date of hospital discharge of death <sup>c</sup>       | 31,755  | 522,167 | 94%        |
| Date of onset of illness                               | 0       | 522,167 | 100%       |
| Date of treatment with drugs                           | 6,993   | 93,688  | 93%        |
| Date of hospitalization <sup>c</sup>                   | 3,170   | 522,167 | 99%        |
| Date of ICU admission <sup>c</sup>                     | 3,580   | 172,473 | 98%        |
| Date of case closed                                    | 8,457   | 468,664 | 98%        |
| Clinical outcome (discharge, death, still in hospital) | 11,126  | 522,167 | 98%        |

a. Unlike other fields (such as age and sex), comorbidities, symptoms, peruperal, and drugs are not mandatory. Non-response does not necessarily mean missing information, but absence of those conditions.

b. The 36 observations missing municipality of residence are foreigners.

c. Missingness in several date variables could be resolved by cross-checking with other variables. Doing so reduced missingness by 0.04-10.3 percentage points from the original missingness shown above.

**Supplementary Figure 1: Cumulative number of COVID-19 hospitalizations, ICU admissions, and deaths.** Although hospitalizations occurred early in January, confirmed laboratory results were only made available in late February.

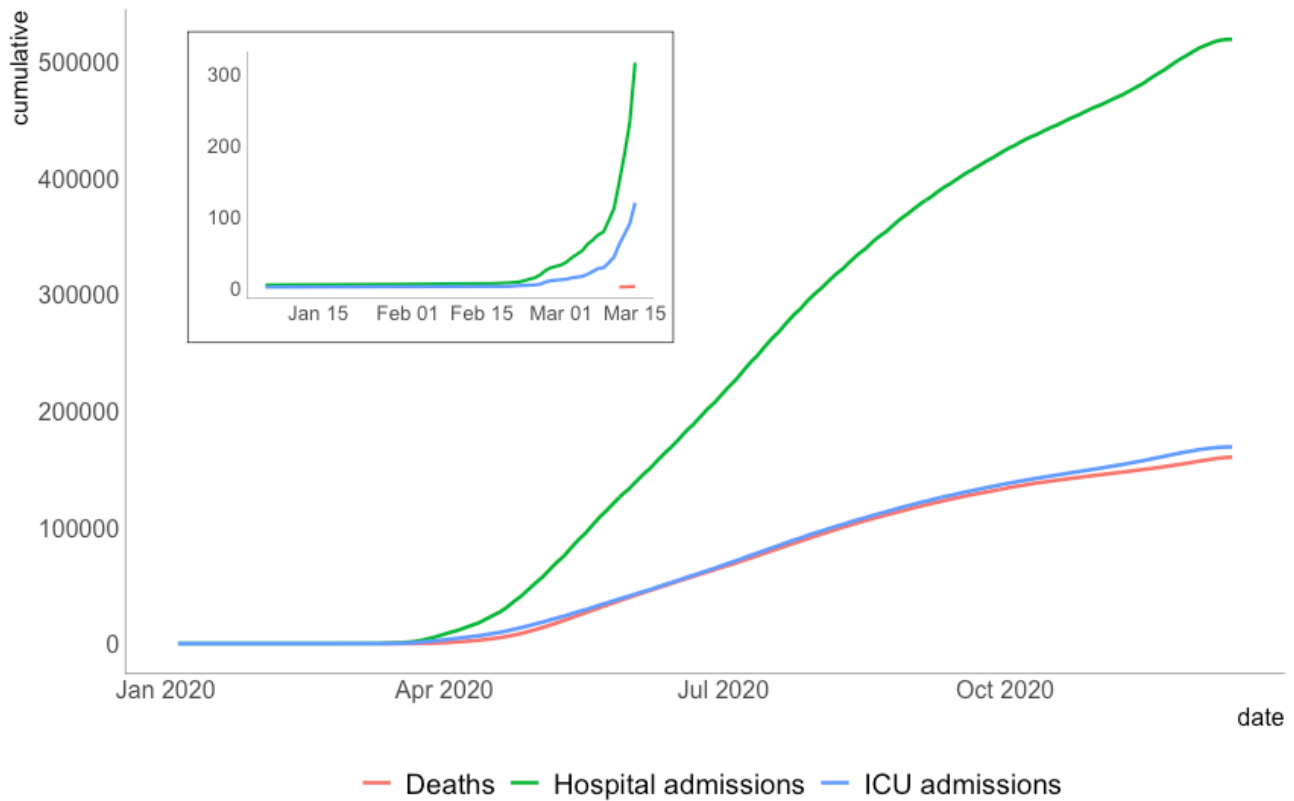

view only



**Supplementary Figure 2: Survival curves (Kaplan Meier) 60 days after hospital admission:**

Note: N = North, NE = Northeast, CW = Center-West, SE = Southeast, S = South

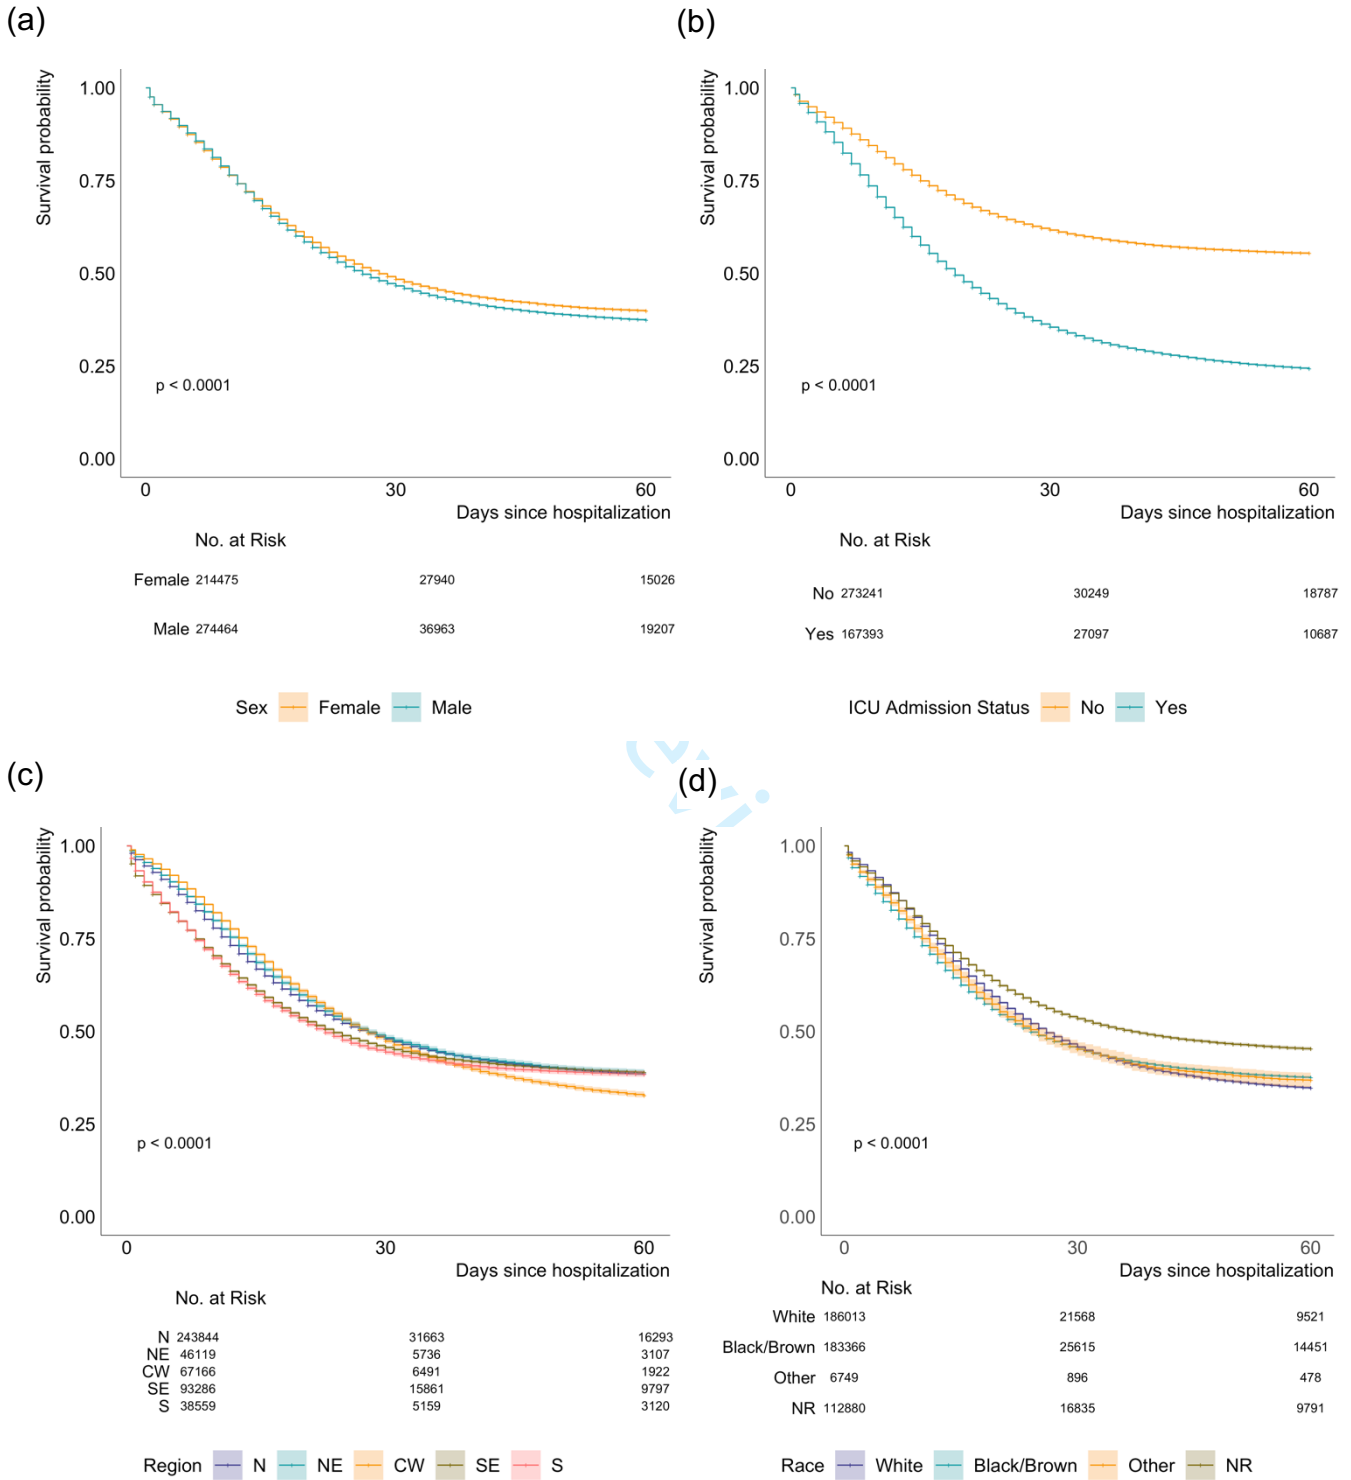

## STROBE Statement—checklist of items that should be included in reports of observational studies

|                              | Item No | Recommendation                                                                                                                                                                                                                                                                                                                                                                                                                                                         | Page No |
|------------------------------|---------|------------------------------------------------------------------------------------------------------------------------------------------------------------------------------------------------------------------------------------------------------------------------------------------------------------------------------------------------------------------------------------------------------------------------------------------------------------------------|---------|
| <b>Title and abstract</b>    | 1       | (a) Indicate the study's design with a commonly used term in the title or the abstract                                                                                                                                                                                                                                                                                                                                                                                 | 1       |
|                              |         | (b) Provide in the abstract an informative and balanced summary of what was done and what was found                                                                                                                                                                                                                                                                                                                                                                    | 2       |
| <b>Introduction</b>          |         |                                                                                                                                                                                                                                                                                                                                                                                                                                                                        |         |
| Background/rationale         | 2       | Explain the scientific background and rationale for the investigation being reported                                                                                                                                                                                                                                                                                                                                                                                   | 4       |
| Objectives                   | 3       | State specific objectives, including any prespecified hypotheses                                                                                                                                                                                                                                                                                                                                                                                                       | 4       |
| <b>Methods</b>               |         |                                                                                                                                                                                                                                                                                                                                                                                                                                                                        |         |
| Study design                 | 4       | Present key elements of study design early in the paper                                                                                                                                                                                                                                                                                                                                                                                                                | 5       |
| Setting                      | 5       | Describe the setting, locations, and relevant dates, including periods of recruitment, exposure, follow-up, and data collection                                                                                                                                                                                                                                                                                                                                        | 4-5     |
| Participants                 | 6       | (a) <i>Cohort study</i> —Give the eligibility criteria, and the sources and methods of selection of participants. Describe methods of follow-up<br><i>Case-control study</i> —Give the eligibility criteria, and the sources and methods of case ascertainment and control selection. Give the rationale for the choice of cases and controls<br><i>Cross-sectional study</i> —Give the eligibility criteria, and the sources and methods of selection of participants | 5       |
|                              |         | (b) <i>Cohort study</i> —For matched studies, give matching criteria and number of exposed and unexposed<br><i>Case-control study</i> —For matched studies, give matching criteria and the number of controls per case                                                                                                                                                                                                                                                 |         |
| Variables                    | 7       | Clearly define all outcomes, exposures, predictors, potential confounders, and effect modifiers. Give diagnostic criteria, if applicable                                                                                                                                                                                                                                                                                                                               | 5-6     |
| Data sources/<br>measurement | 8*      | For each variable of interest, give sources of data and details of methods of assessment (measurement). Describe comparability of assessment methods if there is more than one group                                                                                                                                                                                                                                                                                   | 5       |
| Bias                         | 9       | Describe any efforts to address potential sources of bias                                                                                                                                                                                                                                                                                                                                                                                                              | 6       |
| Study size                   | 10      | Explain how the study size was arrived at                                                                                                                                                                                                                                                                                                                                                                                                                              | 5       |
| Quantitative variables       | 11      | Explain how quantitative variables were handled in the analyses. If applicable, describe which groupings were chosen and why                                                                                                                                                                                                                                                                                                                                           | 6       |
| Statistical methods          | 12      | (a) Describe all statistical methods, including those used to control for confounding                                                                                                                                                                                                                                                                                                                                                                                  | 5-6     |
|                              |         | (b) Describe any methods used to examine subgroups and interactions                                                                                                                                                                                                                                                                                                                                                                                                    |         |
|                              |         | (c) Explain how missing data were addressed                                                                                                                                                                                                                                                                                                                                                                                                                            |         |
|                              |         | (d) <i>Cohort study</i> —If applicable, explain how loss to follow-up was addressed<br><i>Case-control study</i> —If applicable, explain how matching of cases and controls was addressed<br><i>Cross-sectional study</i> —If applicable, describe analytical methods taking account of sampling strategy                                                                                                                                                              |         |
|                              |         | (e) Describe any sensitivity analyses                                                                                                                                                                                                                                                                                                                                                                                                                                  |         |

Continued on next page

1  
2  
3  
4  
5  
6  
7  
8  
9  
10  
11  
12  
13  
14  
15  
16  
17  
18  
19  
20  
21  
22  
23  
24  
25  
26  
27  
28  
29  
30  
31  
32  
33  
34  
35  
36  
37  
38  
39  
40  
41  
42  
43  
44  
45  
46  
47  
48  
49  
50  
51  
52  
53  
54  
55  
56  
57  
58  
59  
60

| <b>Results</b>           |     |                                                                                                                                                                                                              |       |
|--------------------------|-----|--------------------------------------------------------------------------------------------------------------------------------------------------------------------------------------------------------------|-------|
| Participants             | 13* | (a) Report numbers of individuals at each stage of study—eg numbers potentially eligible, examined for eligibility, confirmed eligible, included in the study, completing follow-up, and analysed            | 7     |
|                          |     | (b) Give reasons for non-participation at each stage                                                                                                                                                         |       |
|                          |     | (c) Consider use of a flow diagram                                                                                                                                                                           |       |
| Descriptive data         | 14* | (a) Give characteristics of study participants (eg demographic, clinical, social) and information on exposures and potential confounders                                                                     | 7-9   |
|                          |     | (b) Indicate number of participants with missing data for each variable of interest                                                                                                                          | 7-8   |
|                          |     | (c) <i>Cohort study</i> —Summarise follow-up time (eg, average and total amount)                                                                                                                             |       |
| Outcome data             | 15* | <i>Cohort study</i> —Report numbers of outcome events or summary measures over time                                                                                                                          | 7-10  |
|                          |     | <i>Case-control study</i> —Report numbers in each exposure category, or summary measures of exposure                                                                                                         |       |
|                          |     | <i>Cross-sectional study</i> —Report numbers of outcome events or summary measures                                                                                                                           | 7-10  |
| Main results             | 16  | (a) Give unadjusted estimates and, if applicable, confounder-adjusted estimates and their precision (eg, 95% confidence interval). Make clear which confounders were adjusted for and why they were included | 13-14 |
|                          |     | (b) Report category boundaries when continuous variables were categorized                                                                                                                                    | 7-11  |
|                          |     | (c) If relevant, consider translating estimates of relative risk into absolute risk for a meaningful time period                                                                                             |       |
| Other analyses           | 17  | Report other analyses done—eg analyses of subgroups and interactions, and sensitivity analyses                                                                                                               |       |
| <b>Discussion</b>        |     |                                                                                                                                                                                                              |       |
| Key results              | 18  | Summarise key results with reference to study objectives                                                                                                                                                     | 14-18 |
| Limitations              | 19  | Discuss limitations of the study, taking into account sources of potential bias or imprecision. Discuss both direction and magnitude of any potential bias                                                   | 17    |
| Interpretation           | 20  | Give a cautious overall interpretation of results considering objectives, limitations, multiplicity of analyses, results from similar studies, and other relevant evidence                                   | 14-18 |
| Generalisability         | 21  | Discuss the generalisability (external validity) of the study results                                                                                                                                        | 18    |
| <b>Other information</b> |     |                                                                                                                                                                                                              |       |
| Funding                  | 22  | Give the source of funding and the role of the funders for the present study and, if applicable, for the original study on which the present article is based                                                | 18    |

\*Give information separately for cases and controls in case-control studies and, if applicable, for exposed and unexposed groups in cohort and cross-sectional studies.

**Note:** An Explanation and Elaboration article discusses each checklist item and gives methodological background and published examples of transparent reporting. The STROBE checklist is best used in conjunction with this article (freely available on the Web sites of PLoS Medicine at <http://www.plosmedicine.org/>, Annals of Internal Medicine at <http://www.annals.org/>, and Epidemiology at <http://www.epidem.com/>). Information on the STROBE Initiative is available at [www.strobe-statement.org](http://www.strobe-statement.org).

# BMJ Open

## Characteristics, outcomes and risk factors for mortality of 522,167 patients hospitalized with COVID-19 in Brazil: a retrospective cohort study

|                                 |                                                                                                                                                                                                                                                                                                                                                                                                         |
|---------------------------------|---------------------------------------------------------------------------------------------------------------------------------------------------------------------------------------------------------------------------------------------------------------------------------------------------------------------------------------------------------------------------------------------------------|
| Journal:                        | <i>BMJ Open</i>                                                                                                                                                                                                                                                                                                                                                                                         |
| Manuscript ID                   | bmjopen-2021-049089.R1                                                                                                                                                                                                                                                                                                                                                                                  |
| Article Type:                   | Original research                                                                                                                                                                                                                                                                                                                                                                                       |
| Date Submitted by the Author:   | 17-Feb-2021                                                                                                                                                                                                                                                                                                                                                                                             |
| Complete List of Authors:       | Castro, Marcia; Harvard University T H Chan School of Public Health, Global Health and Population<br>Gurzenda, Susie; Harvard University T H Chan School of Public Health, Global Health and Population<br>Macário, Eduardo; Brazilian Ministry of Health, Secretariat of Health Surveillance<br>Araújo de França, Giovanny ; Brazilian Ministry of Health, Secretariat of Health Surveillance Brasília |
| <b>Primary Subject Heading</b>: | Public health                                                                                                                                                                                                                                                                                                                                                                                           |
| Secondary Subject Heading:      | Global health, Infectious diseases                                                                                                                                                                                                                                                                                                                                                                      |
| Keywords:                       | Public health < INFECTIOUS DISEASES, COVID-19, PUBLIC HEALTH                                                                                                                                                                                                                                                                                                                                            |
|                                 |                                                                                                                                                                                                                                                                                                                                                                                                         |

SCHOLARONE™  
Manuscripts



I, the Submitting Author has the right to grant and does grant on behalf of all authors of the Work (as defined in the below author licence), an exclusive licence and/or a non-exclusive licence for contributions from authors who are: i) UK Crown employees; ii) where BMJ has agreed a CC-BY licence shall apply, and/or iii) in accordance with the terms applicable for US Federal Government officers or employees acting as part of their official duties; on a worldwide, perpetual, irrevocable, royalty-free basis to BMJ Publishing Group Ltd ("BMJ") its licensees and where the relevant Journal is co-owned by BMJ to the co-owners of the Journal, to publish the Work in this journal and any other BMJ products and to exploit all rights, as set out in our [licence](#).

The Submitting Author accepts and understands that any supply made under these terms is made by BMJ to the Submitting Author unless you are acting as an employee on behalf of your employer or a postgraduate student of an affiliated institution which is paying any applicable article publishing charge ("APC") for Open Access articles. Where the Submitting Author wishes to make the Work available on an Open Access basis (and intends to pay the relevant APC), the terms of reuse of such Open Access shall be governed by a Creative Commons licence – details of these licences and which [Creative Commons](#) licence will apply to this Work are set out in our licence referred to above.

Other than as permitted in any relevant BMJ Author's Self Archiving Policies, I confirm this Work has not been accepted for publication elsewhere, is not being considered for publication elsewhere and does not duplicate material already published. I confirm all authors consent to publication of this Work and authorise the granting of this licence.

1  
2  
3 1 **Characteristics, outcomes and risk factors for mortality of 522,167 patients**  
4  
5  
6 2 **hospitalized with COVID-19 in Brazil: a retrospective cohort study**  
7  
8  
9 3

10  
11 4 Marcia C. Castro, PhD<sup>1\*</sup>, Susie Gurzenda, SM<sup>1</sup>, Eduardo Marques Macário, PhD<sup>2</sup>, Giovanni V.  
12  
13 5 A. França, PhD<sup>2</sup>  
14  
15

16 6  
17  
18 7 <sup>1</sup> Harvard T.H. Chan School of Public Health, Department of Global Health and Population, 665  
19  
20 8 Huntington Avenue, Building 1, 11th floor, Boston, MA 02115, United States of America  
21  
22

23 9 <sup>2</sup> Secretariat of Health Surveillance, Brazilian Ministry of Health, Setor de Rádio e Televisão  
24  
25 10 Norte (SRTV) 701, Via W5 Norte, Edifício PO700. Brasília, Distrito Federal, 70719-040, Brazil  
26  
27

28 11  
29  
30  
31 12 \* Corresponding author: Harvard T.H. Chan School of Public Health, Department of Global  
32  
33 13 Health and Population, 665 Huntington Avenue, Building 1, 11th floor, room 1102A, Boston,  
34  
35 14 MA 02115, United States of America. Tel: +1-617-432-6731. Email: mcastro@hsph.harvard.edu  
36  
37

38 15  
39  
40 16 **Word count: 2,751**  
41  
42  
43 17  
44  
45 18  
46  
47  
48  
49  
50  
51  
52  
53  
54  
55  
56  
57  
58  
59  
60

## 19 ABSTRACT

### 20 Objective

21 To provide a comprehensive description of demographic, clinical, and radiographic  
22 characteristics; treatment and case outcomes; and risk factors associated with in-hospital death of  
23 patients hospitalized with COVID-19 in Brazil.

### 25 Design

26 Retrospective cohort study of hospitalized patients diagnosed with COVID-19.

### 28 Setting

29 Data from all hospitals across Brazil.

### 31 Participants

32 522,167 hospitalized patients in Brazil by December 14, 2020 with severe acute respiratory  
33 illness, and a confirmed diagnosis for COVID-19.

### 35 Primary and Secondary Outcome Measures

36 Prevalence of symptoms and comorbidities were compared by clinical outcomes and intensive  
37 care unit (ICU) admission status. Survival was assessed using Kaplan Meier survival estimates.  
38 Risk factors associated with in-hospital death were evaluated with multivariable Cox  
39 proportional hazards regression.

### 41 Results

42 Of the 522,167 patients included in this study, 56.7% were discharged, 0.002% died of other  
43 causes, 30.7% died of causes associated with COVID-19, and 10.2% remained hospitalized. The  
44 median age of patients was 61 years (interquartile range [IQR], 47-73), and of non-survivors 71  
45 years (IQR, 60-80); 292,570 patients (56.0%) were men. At least one comorbidity was present in  
46 64.5% of patients and in 76.8% of non-survivors. From illness onset, the median times to  
47 hospital and ICU admission were 6 days (IQR, 3-9) and 7 days (IQR, 3-10), respectively; 15  
48 days (IQR, 9-24) to death, and 15 days (IQR, 11-20) to hospital discharge. Risk factors for in-  
49 hospital death included old age, Black/Brown ethnoracial self-classification, ICU admission,  
50 being male, living in the North and Northeast regions, and various co-morbidities. Age had the  
51 highest hazard ratios of 5.51 (95% CI: 4.91-6.18) for patients  $\geq 80$ , compared to those  $\leq 20$ .

### 53 Conclusions

54 Characteristics of patients and risk factors for in-hospital mortality highlight inequities of  
55 COVID-19 outcomes in Brazil. As the pandemic continues to unfold, targeted policies that  
56 address those inequities are needed to mitigate the unequal burden of COVID-19.

## STRENGTHS AND LIMITATIONS OF THIS STUDY

- The strength of this study is that it leverages Brazil's established national Influenza Epidemiological Surveillance Information System data to present comprehensive characteristics, clinical course, and risk factors for COVID-19 in-hospital deaths across Brazil.
- Administrative records lack details available in hospital medical records and may have accuracy and completeness problems.
- We did not have access to laboratory results other than COVID-19 tests (e.g., complete blood count) that would allow for a better characterization of the clinical course of the disease.
- COVID-19 deaths at home likely follow a different clinical course than deaths in the hospital and are not included in this analysis.
- In-hospital deaths due to COVID-19 are likely under-reported and are limited by the testing protocol and capacity of each hospital.



## 73 INTRODUCTION

74 On March 11, 2020 the World Health Organization declared COVID-19 as a pandemic. Caused  
75 by the novel coronavirus SARS-CoV-2, it emerged in China and quickly spread across the  
76 country and beyond. As of February 16, 2021, it was present in 223 countries and territories,  
77 with 108,822,960 confirmed cases and 2,403,641 confirmed deaths.<sup>1</sup> Brazil recorded the first  
78 confirmed COVID-19 case on February 26, 2020 and the first death on March 12, both in São  
79 Paulo State. In 24 days, the disease had spread to all Federal Units. As of February 16, 2021,  
80 9,834,513 cases (9% of worldwide cases) and 239,245 deaths (10% of worldwide deaths) had  
81 been reported in Brazil, the second-highest in the world, behind only the US. These numbers are  
82 underestimated since most mild cases are not being tested and thus are not likely to be reported,  
83 and some deaths may be reported with ill-defined causes, or not reported at all.

84 Brazil has a comprehensive health information system,<sup>2</sup> with the systematic collection of births,  
85 deaths, hospitalizations, and diseases of mandatory notification, among others. However, a  
86 complete and linked registry of records combining data from ambulatory and inpatient care,  
87 laboratory and radiologic results, and outcome of the disease is not available. Therefore, there is  
88 limited information on the course of the disease for every case reported in Brazil.

89 Currently, the most detailed data available in Brazil refer to hospitalizations due to severe acute  
90 respiratory illness (SARI). Here, we use these data to provide a comprehensive description of  
91 demographic, clinical, and radiographic characteristics, treatment, case outcome, and risk factors  
92 associated with in-hospital death of patients hospitalized with SARI with a confirmed diagnosis  
93 for COVID-19, as of December 14, 2020. We analyze the largest retrospective number of cases  
94 (N=522,167) and we assess whether the Brazilian case is comparable to patterns previously  
95 described for other countries.

1  
2  
3 96  
4  
5  
67 **METHODS**8  
9 **Data Sources**

10 We used de-identified records from the Influenza Epidemiological Surveillance Information  
11 System (*Sistema de Informação de Vigilância Epidemiológica da Gripe, SIVEP-Gripe*, in  
12 Portuguese), an information system of the Ministry of Health that captures all notifications of  
13 SARI hospitalizations in both public and private hospitals. The system is updated daily, and  
14 every two weeks a new dataset is made publicly available  
15 (<https://opendatasus.saude.gov.br/nl/dataset>). Here we analyzed records as of December 14, 2020  
16 (N=1,029,684 notifications), after 15,419 duplicate records were removed by the Ministry of  
17 Health. Each record has data on patient's age, sex, place of residence and of hospitalization,  
18 ethnoracial self-classification,<sup>3</sup> pregnancy status, comorbidities, and symptoms; drug treatment;  
19 radiologic test results; and dates of illness onset, hospitalization, ICU admission, and outcome  
20 (death, release, still hospitalized). We considered only records of patients hospitalized with a  
21 confirmed diagnosis for COVID-19 (N = 522,167). Diagnosis followed the Ministry of Health  
22 guidelines.<sup>4</sup>

23  
24  
25  
26  
27  
28  
29  
30  
31  
32  
33  
34  
35  
36  
37  
38  
39  
40  
41  
42  
43  
44 **Statistical Analysis**

45 Characteristics of inpatients were summarized in three groups: demographic, clinical and  
46 radiographic, and treatment and outcomes. Medians and interquartile ranges (IQR) were used to  
47 describe continuous variables, and counts and percentages to describe categorical variables.  
48 Differences between inpatients that needed and did not need ICU admission and those that  
49 survived and did not survive were assessed by Whitney U,  $\chi^2$ , or Fisher's exact test, as

1  
2  
3 119 appropriate. No data imputation was performed for missing data (see online supplementary table  
4  
5 120 1 for information on data completeness).  
6  
7  
8 121 Survival curves of inpatients at 60 days of hospitalization by age, sex, ethnoracial self-  
9  
10 122 classification, region, and ICU admission were estimated using the Kaplan-Meier estimator and  
11  
12 123 compared with the log-rank test. Factors associated with inpatient death were identified by  
13  
14 124 univariable and multivariable logistic regression (excluding from the analysis those that  
15  
16 125 remained hospitalized). Considering time to death as the outcome, hazard ratios were estimated  
17  
18 126 using Cox proportional-hazards models. Based on previous studies<sup>5-7</sup> and on our available  
19  
20 127 information, covariates included in both logistic and Cox models were age (0-19, 20-39, 40-59,  
21  
22 128 60-69, 70-79, and 80 or more years), sex, ethnoracial self-classification (White, Black/Brown,  
23  
24 129 other, not reported), region (North – where Amazonia is located, Northeast, South, Southeast –  
25  
26 130 where the cities of São Paulo and Rio de Janeiro are located, and Center-West), comorbidities  
27  
28 131 (diabetes, asthma, chronic liver disease, chronic neurological disease, chronic lung disease,  
29  
30 132 immunodeficiency, and chronic kidney disease), obesity, and ICU admission. The variable  
31  
32 133 ethnoracial self-classification was missing in 23.1% of the records, and we added those as a  
33  
34 134 separate category (not reported). Distances between municipalities of residence and  
35  
36 135 hospitalization were calculated in ArcMap, version 10.6 (ESRI, Redlands, CA, USA). All  
37  
38 136 analyses were performed in Stata, version 15.1 (Stata Corp., College Station, TX, USA), and R  
39  
40 137 version 4.0.0 (RStudio Team, Boston, MA, USA).

46  
47 138

### 49 139 **Patient and public involvement**

50  
51 140 Our analysis used administrative records, and thus study participants were not involved in the  
52  
53 141 design of the study. Public involvement was achieved through collaboration with the Ministry of  
54  
55  
56  
57  
58  
59

1  
2  
3 142 Health, with whom we defined the research questions to fill in knowledge gaps and inform  
4  
5 143 decision making. Results were discussed and shared with the Ministry, and their wide  
6  
7 144 dissemination with public health officials, researchers, and through the media will reach the  
8  
9  
10 145 broader public.  
11  
12  
13 146  
14  
15

## 16 147 **RESULTS**

17  
18  
19 148 As of December 14, 2020, 522,167 patients had been hospitalized with confirmed COVID-19  
20  
21 149 since the beginning of the epidemic in Brazil. Of those, 296,002 (56.7%) were discharged, 1,004  
22  
23 150 (0.002%) died of other causes, 160,495 (30.7%) died of causes associated with COVID-19,  
24  
25 151 53,503 (10.2%) remained hospitalized. Clinical outcome was unknown for 11,126 (2.1%)  
26  
27 152 patients (table 1). The cumulative curve of hospital admissions (online supplementary figure 1)  
28  
29 153 shows the fast increase in severe cases that required hospitalization, following the steep increase  
30  
31 154 in COVID-19 transmission in Brazil since the end of March. The median age of patients was 61  
32  
33 155 years (IQR, 47-73), and much higher for non-survivors, 71 years (IQR, 60-80), as shown by the  
34  
35 156 age distribution in figures 1a-b. Patients aged 60 years or more represented 50.1% of  
36  
37 157 hospitalizations, 59.0% of ICU admissions, and 74.0% of deaths associated with COVID-19.  
38  
39 158 Patients were mostly males (56.0%) and from the Southeast region (49.3%). Among females,  
40  
41 159 2.5% were pregnant or puerperal at the time of hospitalization, and 7.5% of those died in the  
42  
43 160 hospital. A total of 172,473 (33.0%) patients with median age of 65 years (IQR, 52-76) needed  
44  
45 161 ICU admission. Of all hospitalizations, 37.7% of the patients were White, and 37.9% were  
46  
47 162 Black/Brown. Among survivors, 38.8% were White, while among non-survivors 41.7% were  
48  
49 163 Black/Brown. About 25% of the patients traveled a median of 32.0 km (IQR, 18.6-64.1) to be  
50  
51 164 hospitalized in a municipality different from where they reside (table 1).  
52  
53  
54  
55  
56  
57  
58  
59  
60

Table 1. Demographic characteristics of patients

| Characteristic                                             | All patients<br>(N = 522,167) <sup>a</sup> | ICU<br>admission<br>(N = 172,473) | Non-ICU<br>admission<br>(N = 293,384) | Not reported<br>(N = 56,310) | p-<br>value | Survivor &<br>non-COVID-<br>19 death<br>(N = 297,043) | Non-survivor<br>(N = 160,495) <sup>b</sup> | Still in the<br>hospital<br>(N = 53,503) | p-<br>value |
|------------------------------------------------------------|--------------------------------------------|-----------------------------------|---------------------------------------|------------------------------|-------------|-------------------------------------------------------|--------------------------------------------|------------------------------------------|-------------|
| Age                                                        |                                            |                                   |                                       |                              |             |                                                       |                                            |                                          |             |
| Median (IQR) - years                                       | 61 (47-73)                                 | 65 (52-76)                        | 59 (45-72)                            | 61 (47-74)                   | <0.001      | 56 (42-68)                                            | 71 (60-80)                                 | 60 (46-72)                               | <0.001      |
| Distribution, number (%)                                   |                                            |                                   |                                       |                              | <0.001      |                                                       |                                            |                                          | <0.001      |
| 0-19                                                       | 13,136 (2.5)                               | 3,211 (1.9)                       | 8,517 (2.9)                           | 1,408 (2.5)                  |             | 9,994 (3.4)                                           | 985 (0.6)                                  | 1,628 (3.0)                              |             |
| 20-39                                                      | 71,728 (13.7)                              | 16,978 (9.8)                      | 46,823 (16.0)                         | 7,927 (14.1)                 |             | 54,889 (18.5)                                         | 7,299 (4.6)                                | 7,814 (14.6)                             |             |
| 40-59                                                      | 170,266 (32.6)                             | 50,445 (29.3)                     | 101,922 (34.7)                        | 17,899 (31.8)                |             | 114,769 (38.6)                                        | 33,405 (20.8)                              | 18,196 (34.0)                            |             |
| 60-69                                                      | 108,416 (20.8)                             | 39,362 (22.8)                     | 57,404 (19.6)                         | 11,650 (20.7)                |             | 56,788 (19.1)                                         | 38,044 (23.7)                              | 11,352 (21.2)                            |             |
| 70-79                                                      | 90,800 (17.4)                              | 35,944 (20.8)                     | 44,943 (15.3)                         | 9,913 (17.6)                 |             | 38,304 (12.9)                                         | 41,883 (26.1)                              | 8,942 (16.7)                             |             |
| ≥ 80                                                       | 67,808 (13.0)                              | 26,530 (15.4)                     | 33,769 (11.5)                         | 7,509 (13.3)                 |             | 22,303 (7.5)                                          | 38,872 (24.2)                              | 5,570 (10.4)                             |             |
| Sex, number (%)                                            |                                            |                                   |                                       |                              | <0.001      |                                                       |                                            |                                          | <0.001      |
| Male                                                       | 292,570 (56.0)                             | 100,399 (58.2)                    | 161,377 (55.0)                        | 30,794 (54.7)                |             | 163,967 (55.2)                                        | 92,376 (58.6)                              | 30,146 (56.3)                            |             |
| Female                                                     | 229,513 (44.9)                             | 72,060 (41.8)                     | 131,964 (45.0)                        | 25,489 (45.3)                |             | 133,028 (44.8)                                        | 68,101 (42.4)                              | 23,345 (43.6)                            |             |
| Pregnant, number (%)                                       | 4,441 (1.9)                                | 802 (1.1)                         | 3,249 (2.5)                           | 390 (1.5)                    | <0.001      | 3,603 (2.7)                                           | 230 (0.3)                                  | 469 (2.0)                                | <0.001      |
| Puerperal, number (%)                                      | 1,350 (0.6)                                | 426 (0.6)                         | 850 (0.6)                             | 74 (0.3)                     | <0.001      | 965 (0.7)                                             | 204 (0.4)                                  | 148 (0.6)                                | <0.001      |
| Ethnoracial, number (%)                                    |                                            |                                   |                                       |                              | <0.001      |                                                       |                                            |                                          | <0.001      |
| White                                                      | 196,035 (37.5)                             | 67,619 (39.2)                     | 114,339 (39.0)                        | 14,077 (25.0)                |             | 115,358 (38.8)                                        | 58,487 (36.4)                              | 19,257 (36.0)                            |             |
| Black/Brown                                                | 198,096 (37.9)                             | 61,450 (35.6)                     | 114,378 (39.0)                        | 22,268 (39.6)                |             | 106,312 (35.8)                                        | 66,889 (41.7)                              | 19,891 (37.2)                            |             |
| Other                                                      | 7,237 (1.4)                                | 2,135 (1.2)                       | 4,191 (1.4)                           | 911 (1.6)                    |             | 4,028 (1.4)                                           | 2,332 (1.5)                                | 710 (1.3)                                |             |
| Not reported                                               | 120,799 (23.1)                             | 41,269 (23.9)                     | 60,476 (20.6)                         | 19,054 (33.8)                |             | 71,345 (24.0)                                         | 32,787 (20.4)                              | 13,645 (25.5)                            |             |
| Region of residence, number (%)                            |                                            |                                   |                                       |                              | <0.001      |                                                       |                                            |                                          | <0.001      |
| North                                                      | 41,961 (8.0)                               | 10,024 (5.8)                      | 27,065 (9.2)                          | 4,872 (8.7)                  |             | 23,149 (7.8)                                          | 14,537 (9.1)                               | 3,559 (6.7)                              |             |
| Northeast                                                  | 104,213 (20.0)                             | 33,220 (19.3)                     | 50,377 (17.2)                         | 20,616 (36.6)                |             | 49,733 (16.7)                                         | 37,919 (23.6)                              | 12,695 (23.7)                            |             |
| Center-West                                                | 48,864 (9.4)                               | 16,581 (9.6)                      | 28,872 (9.8)                          | 3,411 (6.1)                  |             | 29,169 (9.8)                                          | 13,532 (8.4)                               | 4,759 (8.9)                              |             |
| Southeast                                                  | 257,503 (49.3)                             | 88,817 (51.5)                     | 144,010 (49.1)                        | 24,676 (43.8)                |             | 151,595 (51.0)                                        | 76,494 (47.7)                              | 25,050 (46.8)                            |             |
| South                                                      | 69,590 (13.3)                              | 23,814 (13.8)                     | 43,042 (14.7)                         | 2,734 (4.9)                  |             | 43,380 (14.6)                                         | 17,997 (11.2)                              | 7,439 (13.9)                             |             |
| Foreigner                                                  | 36 (0.0)                                   | 17 (0.0)                          | 18 (0.0)                              | 1 (0.0)                      |             | 17 (0.0)                                              | 16 (0.0)                                   | 1 (0.0)                                  |             |
| Hospital in the same municipality of residence, number (%) |                                            |                                   |                                       |                              | <0.001      |                                                       |                                            |                                          | <0.001      |
| Yes                                                        | 388,304 (74.4)                             | 118,002 (68.4)                    | 227,423 (77.5)                        | 42,879 (76.2)                |             | 224,134 (75.5)                                        | 116,664 (72.7)                             | 39,772 (74.3)                            |             |
| No                                                         | 133,827 (25.6)                             | 54,454 (31.6)                     | 65,943 (22.5)                         | 13,430 (23.9)                |             | 72,892 (24.5)                                         | 43,815 (27.3)                              | 13,730 (25.7)                            |             |
| Distance (km) from residence to hospital <sup>b</sup>      | 32.0 (18.4-64.1)                           | 35.6 (19.8-77.8)                  | 29.4 (18.0-56.6)                      | 25.8 (14.5-54.7)             | <0.001      | 29.8 (18.1-57.8)                                      | 34.1 (19.1-71.9)                           | 34.5 (18.8-75.9)                         | <0.001      |

<sup>a</sup> Includes 11,126 patients with unknown clinical outcome.

<sup>b</sup> Non-survivors are classified as those whose death was associated with COVID-19, according to the *SIVEP-Gripe* database. Those who had COVID-19 but died due to an unrelated cause are classified under "Survivor & non-COVID-19 death". Survivor N=296,002, non-COVID-19 death=1,041.

<sup>c</sup> Distances (measured in km) are calculated from the centroid of the notification municipality (consistent with municipality of hospitalization) to the centroid of the municipality of residence, using the South America Lambert Conformal Conic projection.

1  
2  
3 172 Comorbidities were observed in 64.5% of the patients, 74.6% of those who needed ICU  
4  
5 173 admission, 76.8% of non-survivors, and 58.5% of the survivors and those whose death was not  
6  
7 174 associated with COVID-19. With the exception of asthma, all comorbidities had a higher  
8  
9 175 prevalence among non-survivors (compared to all patients). The most common comorbidities  
10  
11 176 were chronic cardiovascular disease (34.5% of patients and 43.5% of non-survivors) and diabetes  
12  
13 177 (25.7% of patients and 33.0% of non-survivors). Obesity was reported in 7.4% of the patients  
14  
15 178 and 10.5% of those who needed ICU admission. The most common symptoms were fever,  
16  
17 179 cough, shortness of breath, low oxygen saturation, and respiratory distress symptoms (table 2).  
18  
19  
20  
21  
22  
23  
24  
25  
26  
27  
28  
29  
30  
31  
32  
33  
34  
35  
36  
37  
38  
39  
40  
41  
42  
43  
44  
45  
46  
47  
48  
49  
50  
51  
52  
53  
54  
55  
56  
57  
58  
59  
60

181 **Table 2. Clinical and radiographic characteristics of patients**

| Characteristic                 | All patients<br>(N = 522,167) <sup>a</sup> | ICU<br>admission<br>(N = 172,473) | Non-ICU<br>admission<br>(N = 293,384) | Not reported<br>(N = 56,310) | p-<br>value | Survivor &<br>non-COVID-<br>19 death<br>(N = 297,043) | Non-survivor<br>(N = 160,495) <sup>b</sup> | Still in the<br>hospital<br>(N = 53,503) | p-<br>value |
|--------------------------------|--------------------------------------------|-----------------------------------|---------------------------------------|------------------------------|-------------|-------------------------------------------------------|--------------------------------------------|------------------------------------------|-------------|
| Any comorbidity, number (%)    | 336,909 (64.5)                             | 128,590 (74.6)                    | 179,847 (61.3)                        | 28,472 (50.6)                | <0.001      | 173,828 (58.5)                                        | 123,265 (76.8)                             | 33,318 (62.3)                            | <0.001      |
| Chronic cardiovascular disease | 180,370 (34.5)                             | 72,196 (41.9)                     | 93,574 (31.9)                         | 14,600 (25.9)                | <0.001      | 89,402 (30.1)                                         | 69,768 (43.5)                              | 17,980 (33.6)                            | <0.001      |
| Chronic hematologic diseases   | 4,134 (0.8)                                | 1,687 (1.0)                       | 2,204 (0.8)                           | 243 (0.4)                    | <0.001      | 1,957 (0.7)                                           | 1,739 (1.1)                                | 365 (0.7)                                | <0.001      |
| Chronic hepatic disease        | 4,732 (0.9)                                | 2,101 (1.2)                       | 2,309 (0.8)                           | 322 (0.6)                    | <0.001      | 1,924 (0.7)                                           | 2,368 (1.5)                                | 361 (0.7)                                | <0.001      |
| Asthma                         | 14,567 (2.8)                               | 4,947 (2.9)                       | 8,639 (2.9)                           | 981 (1.7)                    | <0.001      | 9,130 (3.1)                                           | 3,634 (2.3)                                | 1,514 (2.8)                              | <0.001      |
| Diabetes                       | 134,391 (25.7)                             | 53,717 (31.2)                     | 69,078 (23.6)                         | 11,596 (20.6)                | <0.001      | 65,941 (22.2)                                         | 52,958 (33.0)                              | 12,844 (24.0)                            | <0.001      |
| Chronic neurological disease   | 21,016 (4.0)                               | 8,821 (5.1)                       | 10,832 (3.7)                          | 1,363 (2.4)                  | <0.001      | 8,113 (2.7)                                           | 10,943 (6.8)                               | 1,622 (3.0)                              | <0.001      |
| Chronic lung disease           | 20,140 (3.9)                               | 9,249 (5.4)                       | 9,483 (3.2)                           | 1,408 (2.5)                  | <0.001      | 8,222 (2.8)                                           | 10,021 (6.2)                               | 1,621 (3.0)                              | <0.001      |
| Immunodeficiency               | 13,967 (2.7)                               | 5,689 (3.3)                       | 7,376 (2.5)                           | 902 (1.6)                    | <0.001      | 6,351 (2.1)                                           | 6,283 (3.9)                                | 1,132 (2.1)                              | <0.001      |
| Chronic renal disease          | 21,725 (4.2)                               | 10,684 (6.2)                      | 9,429 (3.2)                           | 1,512 (2.9)                  | <0.001      | 8,149 (2.7)                                           | 11,491 (7.2)                               | 1,743 (3.3)                              | <0.001      |
| Obesity                        | 38,415 (7.4)                               | 18,057 (10.5)                     | 17,998 (6.1)                          | 2,360 (4.2)                  | <0.001      | 20,993 (7.1)                                          | 12,765 (8.0)                               | 4,005 (7.5)                              | <0.001      |
| Others <sup>c</sup>            | 144,081 (27.6)                             | 58,139 (33.7)                     | 74,994 (25.6)                         | 10,948 (19.4)                | <0.001      | 72,598 (24.4)                                         | 55,866 (34.8)                              | 13,042 (24.4)                            | <0.001      |
| Symptoms, number (%)           |                                            |                                   |                                       |                              |             |                                                       |                                            |                                          |             |
| Fever                          | 188,572 (64.3)                             | 104,650 (60.7)                    | 188,572 (64.3)                        | 34,789 (61.8)                | <0.001      | 194,578 (65.5)                                        | 93,933 (58.5)                              | 32,586 (60.9)                            | <0.001      |
| Cough                          | 369,192 (70.7)                             | 115,147 (66.7)                    | 215,084 (73.3)                        | 38,961 (69.2)                | <0.001      | 219,433 (73.9)                                        | 105,252 (65.6)                             | 36,717 (68.6)                            | <0.001      |
| Sore throat                    | 90,487 (17.3)                              | 23,531 (13.6)                     | 56,653 (19.3)                         | 10,303 (18.3)                | <0.001      | 56,741 (19.1)                                         | 22,982 (14.3)                              | 8,872 (16.6)                             | <0.001      |
| Shortness of breath            | 367,917 (70.5)                             | 131,799 (76.4)                    | 199,805 (68.1)                        | 36,313 (64.5)                | <0.001      | 200,051 (67.4)                                        | 124,724 (77.7)                             | 35,709 (66.7)                            | <0.001      |
| Respiratory distress syndrome  | 296,238 (56.7)                             | 107,762 (62.5)                    | 163,370 (55.7)                        | 25,106 (44.7)                | <0.001      | 157,412 (53.0)                                        | 104,555 (65.2)                             | 28,046 (52.4)                            | <0.001      |
| Oxygen saturation <95%         | 303,282 (58.1)                             | 116,355 (67.5)                    | 160,837 (54.8)                        | 26,090 (46.3)                | <0.001      | 156,349 (52.6)                                        | 111,097 (69.2)                             | 29,704 (55.5)                            | <0.001      |
| Diarrhea                       | 71,069 (13.6)                              | 20,340 (11.8)                     | 44,411 (15.1)                         | 6,318 (11.2)                 | <0.001      | 44,961 (15.1)                                         | 17,419 (10.9)                              | 7,264 (13.6)                             | <0.001      |
| Vomiting                       | 41,974 (8.0)                               | 11,950 (6.9)                      | 26,177 (8.9)                          | 3,847 (6.8)                  | <0.001      | 25,799 (8.7)                                          | 11,076 (6.9)                               | 4,156 (7.8)                              | <0.001      |
| Others <sup>d</sup>            | 179,222 (34.3)                             | 58,268 (33.8)                     | 105,646 (36.0)                        | 15,308 (27.2)                | <0.001      | 112,278 (37.8)                                        | 45,263 (28.2)                              | 18,294 (34.2)                            | <0.001      |
| Chest radiograph, number (%)   |                                            |                                   |                                       |                              | <0.001      |                                                       |                                            |                                          | <0.001      |
| Normal                         | 11,816 (2.3)                               | 3,403 (2.0)                       | 7,782 (2.7)                           | 631 (1.1)                    |             | 7,895 (2.7)                                           | 2,558 (1.6)                                | 1,091 (2.0)                              |             |
| Interstitial abnormalities     | 81,412 (15.6)                              | 28,091 (16.3)                     | 48,864 (16.7)                         | 4,457 (7.9)                  |             | 45,320 (15.3)                                         | 27,071 (16.9)                              | 7,500 (14.0)                             |             |
| Other <sup>e</sup>             | 85,870 (16.4)                              | 35,844 (20.8)                     | 47,185 (16.1)                         | 2,841 (5.1)                  |             | 246,250 (82.9)                                        | 132,429 (82.5)                             | 47,639 (89.0)                            |             |

182 <sup>a</sup> Includes 11,126 patients with unknown clinical outcome.

183 <sup>b</sup> Non-survivors are classified as those whose death was associated with COVID-19, according to the *SIVEP-Gripe* database. Those who had COVID-19 but died  
184 due to an unrelated cause are classified under "Survivor & non-COVID-19 death". Survivor N=296,002, non-COVID-19 death=1,041.

185 <sup>c</sup> Other comorbidities that were not specifically asked about in the survey, but self-reported as "other" include, but are not limited to: hypertension, cancer,  
186 anemia, bronchitis, dyslipidemia, and pulmonary emphysema.

187

1  
2  
3 188 <sup>d</sup> Other symptoms that were not specifically asked about in the surveillance form, but self-reported as “other” include, but are not limited to: loss of taste, loss of  
4 189 smell, myalgia, weakness, body ache, fatigue, exhaustion, tachypnea, and syncope.  
5 190 <sup>e</sup> Includes consolidation, mixed, and other.  
6  
7  
8  
9  
10  
11  
12  
13  
14  
15  
16  
17  
18  
19  
20  
21  
22  
23  
24  
25  
26  
27  
28  
29  
30  
31  
32  
33  
34  
35  
36  
37  
38  
39  
40  
41  
42  
43  
44  
45  
46  
47

For peer review only



1  
2  
3 191 The median time from illness onset to hospital admission was 6 days (IQR, 3-9), slightly shorter  
4  
5 192 among non-survivors, 5 days (IQR, 2-8). Mechanical ventilation was needed by 62.2% of all  
6  
7 193 patients, and by 75.6% of those who died. Invasive ventilation was more common in the ICU  
8  
9  
10 194 (44.0%). Oseltamivir, an antiviral medication, was the most common drug used during treatment  
11  
12 195 (15.8% overall, and 17.6% among those in ICU), and the median time from illness onset to  
13  
14 196 treatment was 5 days (IQR, 3-8). Of the patients that needed ICU, 51.8% died from causes  
15  
16 197 associated with COVID-19, and 19.0% remained hospitalized after ICU discharge for 5 days  
17  
18 198 (IQR, 2-10). The median time from illness onset to ICU admission was 7 days (IQR, 3-10), and  
19  
20 199 the medium length of ICU stay was 8 days (IQR, 3-15) for all patients, 9 days (IQR, 4-16) for the  
21  
22 200 deceased. Among the 160,495 patients who died of causes associated with COVID-19 by  
23  
24 201 December 14, the median time from illness onset to death was 15 days (IQR, 9-24) (table 3).  
25  
26 202 Medium length of hospital stay was 8 days (IQR, 4-17), but longer for those who needed ICU  
27  
28 203 admission, 12 days (IQR, 6-22). The density of time from hospital admission to death is  
29  
30 204 positively skewed, more so for those who did not get admitted to the ICU (figure 1c).  
31  
32 205 Kaplan Meier curves (figure 1d and online supplementary figure 2) for a period of up to 60 days  
33  
34 206 after hospital admission showed that survival curves were significantly different by age, region,  
35  
36 207 sex, ethnoracial self-classification, and ICU admission.  
37  
38  
39  
40  
41  
42  
43  
44  
45  
46  
47  
48  
49  
50  
51  
52  
53  
54  
55  
56  
57  
58  
59  
60

208 **Table 3. Treatment and outcomes of patients**

| Variable                                                 | All patients<br>(N = 522,167) <sup>a</sup> | ICU admission<br>(N = 172,473) | Non-ICU<br>admission<br>(N = 293,384) | Not reported<br>(N = 56,310) | p-value | Survivor &<br>non-COVID-<br>19 death<br>(N = 297,043) | Non-survivor<br>(N = 160,495) | Still in the<br>hospital<br>(N = 53,503) | p-value |
|----------------------------------------------------------|--------------------------------------------|--------------------------------|---------------------------------------|------------------------------|---------|-------------------------------------------------------|-------------------------------|------------------------------------------|---------|
| Treatment with drugs, number (%)                         |                                            |                                |                                       |                              | <0.001  |                                                       |                               |                                          | <0.001  |
| Oseltamivir                                              | 82,659 (15.8)                              | 30,341 (17.6)                  | 47,317 (16.1)                         | 5,001 (8.9)                  |         | 50,091 (16.9)                                         | 27,192 (16.9)                 | 4,242 (7.9)                              |         |
| Zanamivir                                                | 492 (0.1)                                  | 152 (0.1)                      | 303 (0.1)                             | 37 (0.1)                     |         | 298 (0.1)                                             | 128 (0.1)                     | 56 (0.1)                                 |         |
| Other                                                    | 5,008 (1.0)                                | 1,480 (0.9)                    | 3,243 (1.1)                           | 285 (0.5)                    |         | 3,029 (1.0)                                           | 1,118 (0.7)                   | 701 (1.3)                                |         |
| Mechanical ventilation, number (%)                       |                                            |                                |                                       |                              | <0.001  |                                                       |                               |                                          | <0.001  |
| Invasive                                                 | 90,189 (17.3)                              | 75,915 (44.0)                  | 12,019 (4.1)                          | 2,255 (4.0)                  |         | 17,263 (5.8)                                          | 66,652 (41.5)                 | 5,238 (9.8)                              |         |
| Noninvasive                                              | 234,554 (44.9)                             | 65,281 (37.9)                  | 157,913 (53.8)                        | 11,360 (20.2)                |         | 148,930 (50.1)                                        | 54,652 (34.1)                 | 25,925 (48.5)                            |         |
| ICU admission, number (%)                                | 172,473 (33.0)                             | 172,473 (100.0)                | -                                     | -                            |         | 65,102 (21.9)                                         | 89,264 (55.6)                 | 15,614 (29.2)                            | <0.001  |
| Remained hospitalized after ICU<br>discharge, number (%) | 32,770 (19.0)                              | 32,770 (19.0)                  | -                                     | -                            |         | 27,775 (42.7)                                         | 3,243 (3.6)                   | 1,303 (8.4)                              | <0.001  |
| Median length (IQR), days                                | 5 (2-10)                                   | 5 (2-10)                       | -                                     | -                            |         | 5 (2-9)                                               | 7 (2-16)                      | 72 (21-139)                              | <0.001  |
| Median times (IQR), days                                 |                                            |                                |                                       |                              |         |                                                       |                               |                                          |         |
| Illness onset to treatment with drugs                    | 5 (3-8)                                    | 5 (3-8)                        | 6 (3-9)                               | 6 (3-8)                      | <0.001  | 6 (3-9)                                               | 5 (2-8)                       | 6 (3-9)                                  | <0.001  |
| Illness onset to hospitalization                         | 6 (3-9)                                    | 6 (3-9)                        | 6 (3-10)                              | 6 (2-9)                      | <0.001  | 7 (3-10)                                              | 5 (2-8)                       | 6 (3-10)                                 | <0.001  |
| Illness onset to ICU admission                           | 7 (3-10)                                   | 7 (3-10)                       | -                                     | -                            |         | 7 (4-10)                                              | 6 (3-10)                      | 7 (3-10)                                 | <0.001  |
| Hospital admission to ICU admission                      | 0 (0-1)                                    | 0 (0-1)                        | -                                     | -                            |         | 0 (0-1)                                               | 0 (0-1)                       | 0 (0-0)                                  | <0.001  |
| Illness onset to death                                   | 15 (9-24)                                  | 17 (10-25)                     | 13 (7-21)                             | 12 (7-20)                    | <0.001  | -                                                     | 15 (9-24)                     | -                                        | -       |
| Illness onset to hospital discharge                      | 15 (11-20)                                 | 18 (13-27)                     | 14 (10-18)                            | 16 (11-21)                   | <0.001  | 15 (11-20)                                            | -                             | -                                        | -       |
| Hospital admission to death                              | 9 (4-16)                                   | 10 (5-18)                      | 7 (2-14)                              | 5 (1-13)                     | <0.001  | -                                                     | 9 (4-16)                      | -                                        | -       |
| Hospital admission to ICU discharge                      | 9 (4-17)                                   | 9 (4-17)                       | -                                     | -                            |         | 7 (4-14)                                              | 10 (5-10)                     | 6 (2-14)                                 | <0.001  |
| ICU admission to death                                   | 9 (4-16)                                   | 9 (4-16)                       | -                                     | -                            |         | -                                                     | 9 (4-16)                      | -                                        | -       |
| Median length hospital stay (IQR),<br>days               | 8 (4-17)                                   | 12 (6-22)                      | 7 (4-13)                              | 8 (3-18)                     | <0.001  | 7 (4-12)                                              | 9 (4-16)                      | 79 (23-157)                              | <0.001  |
| Median length ICU stay (IQR), days                       | 8 (3-15)                                   | 8 (3-15)                       | -                                     | -                            |         | 6 (3-12)                                              | 9 (4-16)                      | 4 (2-11)                                 | <0.001  |
| Clinical outcomes as of 12/14/2020,<br>number (%)        |                                            |                                |                                       |                              | <0.001  |                                                       |                               |                                          | -       |
| Cured and discharged from hospital                       | 296,002 (56.7)                             | 64,578 (37.4)                  | 202,042 (68.9)                        | 29,382 (52.2)                |         | 296,002 (99.7)                                        | -                             | -                                        |         |
| Death due to other causes                                | 1,041 (0.2)                                | 524 (0.3)                      | 443 (0.2)                             | 74 (0.1)                     |         | 1,041 (0.4)                                           | -                             | -                                        |         |
| Death associated with COVID-19                           | 160,495 (30.7)                             | 89,264 (51.8)                  | 53,282 (18.2)                         | 17,949 (31.9)                |         | -                                                     | 160,495 (100.0)               | -                                        |         |
| Still in the hospital                                    | 53,503 (10.3)                              | 15,614 (9.1)                   | 30,963 (10.6)                         | 6,926 (12.3)                 |         | -                                                     | -                             | 53,503 (100.0)                           |         |

209 <sup>a</sup> Includes 11,126 patients with unknown clinical outcome.210 <sup>b</sup> Non-survivors are classified as those whose death was associated with COVID-19, according to the *SIVEP-Gripe* database. Those who had COVID-19 but died  
211 due to an unrelated cause are classified under "Survivor & non-COVID-19 death". Survivor N=296,002, non-COVID-19 death=1,041.

1  
2  
3 212 Univariable logistic analysis indicated that the odds of in-hospital death progressively increased  
4  
5 213 with age, and were higher for patients who were male, non-white, from the North and Northeast  
6  
7 214 regions, needed ICU care, were obese, and had diabetes and other comorbidities (table 4). The  
8  
9 215 multivariable analysis included 168,936 records (65,670 non-survivors) that had no missing data  
10  
11 216 for covariates. The odds of in-hospital death for males are 1.23 times that of females, and for  
12  
13 217 those in the North and Northeast regions were, respectively, 1.83 and 1.48 times that of patients  
14  
15 218 in the Southeast. The Cox proportional-hazards model included 176,559 records (64,809 non-  
16  
17 219 survivors). Variables associated with in-hospital death were age, sex, ethnoracial self-  
18  
19 220 classification, region, ICU care, and various co-morbidities. Age, however, had the highest  
20  
21 221 hazard ratios, ranging from 1.67 (95% CI: 1.49-1.89) for those aged 20-39, to 5.51 (95% CI:  
22  
23 222 4.91-6.18) for those 80 or older, compared to patients younger than 20 years (table 4).  
24  
25  
26  
27  
28  
29  
30  
31  
32  
33  
34  
35  
36  
37  
38  
39  
40  
41  
42  
43  
44  
45  
46  
47  
48  
49  
50  
51  
52  
53  
54  
55  
56  
57  
58  
59  
60

view only

224 **Table 4: Odds ratios (OR) and hazard ratios (HR) for death among hospitalized patients with confirmed**  
 225 **COVID-19**  
 226

| Variables                                         | Univariable OR <sup>a</sup><br>(95% CI) | p-value <sup>b</sup> | Multivariable OR<br>(95% CI)<br>N = 168,936 | p-value <sup>b</sup> | HR (95% CI) for<br>death within 60<br>days of<br>hospitalization<br>N = 176,559 |
|---------------------------------------------------|-----------------------------------------|----------------------|---------------------------------------------|----------------------|---------------------------------------------------------------------------------|
| Age (reference 0-19)                              |                                         |                      |                                             |                      |                                                                                 |
| 20-39                                             | 1.35 (1.26, 1.46)                       | < 0.001              | 1.66 (1.45, 1.91)                           | < 0.001              | 1.67 (1.48, 1.89)                                                               |
| 40-59                                             | 2.94 (2.74, 3.15)                       | < 0.001              | 2.70 (2.37, 3.09)                           | < 0.001              | 2.21 (1.97, 2.48)                                                               |
| 60-69                                             | 6.76 (6.30, 7.26)                       | < 0.001              | 5.15 (4.52, 5.88)                           | < 0.001              | 3.05 (2.72, 3.43)                                                               |
| 70-79                                             | 11.05 (10.30, 11.86)                    | < 0.001              | 8.24 (7.24, 9.42)                           | < 0.001              | 3.90 (3.48, 4.38)                                                               |
| ≥ 80                                              | 17.58 (16.37, 18.88)                    | < 0.001              | 14.52 (12.74, 16.59)                        | < 0.001              | 5.51 (4.91, 6.18)                                                               |
| Sex (reference Female)                            |                                         |                      |                                             |                      |                                                                                 |
| Male                                              | 1.10 (1.09, 1.11)                       | < 0.001              | 1.23 (1.20, 1.26)                           | < 0.001              | 1.09 (1.07, 1.10)                                                               |
| Ethnoracial self-classification (reference White) |                                         |                      |                                             |                      |                                                                                 |
| Black/Brown                                       | 1.25 (1.24, 1.27)                       | < 0.001              | 1.18 (1.15, 1.22)                           | < 0.001              | 1.08 (1.06, 1.10)                                                               |
| Other                                             | 1.18 (1.12, 1.25)                       | < 0.001              | 1.05 (0.95, 1.16)                           | 0.309                | 1.02 (0.96, 1.10)                                                               |
| Not reported                                      | 0.9 (0.89, 0.92)                        | < 0.001              | 0.77 (0.74, 0.80)                           | < 0.001              | 0.79 (0.77, 0.81)                                                               |
| Region (reference Southeast)                      |                                         |                      |                                             |                      |                                                                                 |
| South                                             | 0.85 (0.83, 0.87)                       | < 0.001              | 0.89 (0.87, 0.92)                           | < 0.001              | 0.91 (0.89, 0.93)                                                               |
| Center-West                                       | 0.96 (0.94, 0.98)                       | < 0.001              | 1.04 (1.00, 1.08)                           | 0.049                | 1.00 (0.97, 1.03)                                                               |
| North                                             | 1.31 (1.28, 1.34)                       | < 0.001              | 1.83 (1.75, 1.92)                           | < 0.001              | 1.34 (1.30, 1.39)                                                               |
| Northeast                                         | 1.61 (1.58, 1.64)                       | < 0.001              | 1.48 (1.43, 1.55)                           | < 0.001              | 1.10 (1.07, 1.12)                                                               |
| ICU                                               | 5.21 (5.14, 5.28)                       | < 0.001              | 5.20 (5.08, 5.32)                           | < 0.001              | 1.78 (1.75, 1.81)                                                               |
| Obesity                                           | 0.91 (0.88, 0.93)                       | < 0.001              | 1.23 (1.18, 1.27)                           | < 0.001              | 1.07 (1.04, 1.10)                                                               |
| Diabetes                                          | 1.32 (1.30, 1.35)                       | < 0.001              | 1.18 (1.15, 1.21)                           | < 0.001              | 1.08 (1.07, 1.10)                                                               |
| Asthma                                            | 0.59 (0.56, 0.61)                       | < 0.001              | 0.81 (0.77, 0.86)                           | < 0.001              | 0.88 (0.84, 0.92)                                                               |
| Chronic liver disease                             | 1.87 (1.76, 1.99)                       | < 0.001              | 1.74 (1.59, 1.90)                           | < 0.001              | 1.33 (1.26, 1.40)                                                               |
| Chronic neurological disease                      | 2.12 (2.06, 2.19)                       | < 0.001              | 1.65 (1.58, 1.73)                           | < 0.001              | 1.18 (1.15, 1.21)                                                               |
| Chronic lung disease                              | 1.92 (1.86, 1.99)                       | < 0.001              | 1.46 (1.40, 1.53)                           | < 0.001              | 1.16 (1.13, 1.19)                                                               |
| Immunodeficiency                                  | 1.53 (1.47, 1.58)                       | < 0.001              | 1.93 (1.83, 2.04)                           | < 0.001              | 1.26 (1.22, 1.31)                                                               |
| Chronic kidney disease                            | 2.23 (2.16, 2.30)                       | < 0.001              | 1.70 (1.63, 1.78)                           | < 0.001              | 1.17 (1.14, 1.21)                                                               |

227 <sup>a</sup> The N varies for univariable OR, depending on the number of missing values for each variable.

228 <sup>b</sup> P-value from Wald test.

## 229 **DISCUSSION**

230 This study described demographic, clinical, and radiographic characteristics, treatment, case  
231 outcome, and risk factors associated with in-hospital death of 522,167 patients hospitalized with  
232 confirmed COVID-19 in Brazil. Results show that 56.7% were discharged, 0.002% died of other  
233 causes, 30.7% died of causes associated with COVID-19, and 10.2% remained in the hospital as  
234 of December 14. Patients were mostly older than 40 years, predominantly from the Southeast  
235 region, with about one fourth needing to travel to a different municipality for hospitalization. At  
236 least one comorbidity was present in 64.5% of patients and in 76.8% of the non-survivors. From  
237 illness onset, the median time to hospital and ICU admission was 6 and 7 days, respectively; 15  
238 days to death (17 to those admitted to the ICU), and 15 days to hospital discharge (18 days to  
239 those admitted to the ICU). Risk factors for in-hospital death were older age, being male, of  
240 Black/Brown ethnoracial self-classification, living in the North or Northeast regions, with a  
241 history of ICU admission, and various co-morbidities.

242 Our results can be analyzed in light of findings from other countries. The use of mechanical  
243 ventilation was higher in Brazil (62.2% among all patients, 75.6% of the non-survivors)  
244 compared to patterns described for China (ranging from 17.2 to 38.7% of patients),<sup>8-10</sup> and  
245 Germany (17% of patients),<sup>11</sup> but lower than Italy (81.7% of all patients).<sup>12</sup> While ICU mortality  
246 in Italy was 26%,<sup>12</sup> in Brazil it was 51.8%. In Brazil, 33.0% of hospitalized patients were  
247 admitted to the ICU, against 16% in Italy,<sup>13</sup> and 19% in France.<sup>14</sup> In-hospital death was observed  
248 in 18.1% of patients in France,<sup>14</sup> 22% in Germany,<sup>11</sup> and 30.7% in Brazil. The time from illness  
249 onset to hospitalization in China<sup>9</sup> was 11 days (IQR, 8-14), but much shorter in Brazil, 6 days  
250 (IQR, 3-9). The length of hospital stay, however, was about 4 days longer in China.<sup>9</sup> <sup>15</sup> These  
251 comparisons need to be taken with caution. First, studies from China had a smaller sample size,

1  
2  
3 252 and regional variability is very large, as reported for France.<sup>14</sup> In Brazil, for example, in-hospital  
4  
5 253 death varied from 25.9% in the South region to 36.4% in the Northeast, and ICU mortality from  
6  
7 254 48.0% in the Southeast to 66.5% in the North. The time from illness to hospitalization was also  
8  
9 255 longer in the North and Center-West regions, 7 days (IQR, 4-10).

10 256 Our results confirm previous findings regarding symptoms and comorbidities. Hypertension, a  
11  
12 257 very common comorbidity in China<sup>9</sup> could not be measured from our data, but over one-third of  
13  
14 258 the adult population in Brazil has that condition.<sup>16</sup> In Brazil, 35.5% of the patients reported no  
15  
16 259 comorbidities, while in New York City this number was 6.1%,<sup>17</sup> and in China it was 52%.<sup>9</sup>  
17  
18 260 Diabetes was reported in 19% of patients in China,<sup>9</sup> 33.8% in New York City,<sup>17</sup> and 25.7% in  
19  
20 261 Brazil. Part of these differences reflects the disease burden in each locality, but also the lack of  
21  
22 262 standardized data collection (e.g., conditions systematically collected in one country and only  
23  
24 263 reported in the 'other' category in another country).

25  
26 264 The observed associations of age, sex, obesity, and diabetes with in-hospital death corroborate  
27  
28 265 previous findings.<sup>5 6 14</sup> The higher risk among non-white patients was previously reported in  
29  
30 266 Brazil, the UK, and the US.<sup>18-22</sup> In Brazil, this reflects structural inequalities that made large  
31  
32 267 fractions of the population more vulnerable to COVID-19 (e.g., people living in areas with  
33  
34 268 precarious infrastructure, overcrowded households, regions with low supply of physicians and  
35  
36 269 hospital services, and who depend on informal labor).<sup>23 24</sup> Those inequalities are also captured by  
37  
38 270 a higher hazard ratio in the North and Northeast regions, where Brazil consistently reports worse  
39  
40 271 socioeconomic indicators.<sup>25</sup> Currently, the North region has the lowest rates of hospital beds,  
41  
42 272 ICU beds, and physicians per person.<sup>26</sup> Indeed, the region had the worst indicators in terms of  
43  
44 273 mortality and time to hospitalization, and patients who were hospitalized in a municipality  
45  
46 274 different from the one where they live had to travel 122.0 km (IQR, 58.3-258.6) while those in

1  
2  
3 275 the Southeast traveled 22.3 km (IQR, 16.1-36.3). Hospitalization in a different municipality  
4  
5 276 occurs when the place of residence has no hospitals, has no available hospital beds, or when the  
6  
7 277 closest hospital is actually outside the municipality of residence. In Brazil, the size of  
8  
9 278 municipalities varies widely: 23% have 5,000 residents or less, and 5% have 100,000 or more  
10  
11 279 residents. Of the 5,570 municipalities, 37% and 75% have no hospitals and no ICU care,  
12  
13 280 respectively. A regionalization process guarantees that all the population has access to hospital  
14  
15 281 care.<sup>27</sup> However, when hospitals reach capacity, as was observed in several cities in Brazil in late  
16  
17 282 April and May, municipalities without hospitals and ICU units are unable to provide proper care,  
18  
19 283 which may have contributed to higher COVID-19 mortality. Therefore, risk factors for in-  
20  
21 284 hospital mortality due to COVID-19 expose local and structural inequalities.

22  
23  
24  
25 285 This study has some limitations. First, we used administrative records captured in structured  
26  
27 286 surveillance forms. Those lack details available in hospital medical records and may have  
28  
29 287 accuracy and completeness problems. In addition, it limits the types of comorbidities and  
30  
31 288 symptoms reported, as those listed under the 'other' category were not systematically collected  
32  
33 289 from all cases (e.g., loss of taste and smell). Second, we did not have access to laboratory results  
34  
35 290 other than COVID-19 tests (e.g., complete blood count). While this does not change any of our  
36  
37 291 results, they would allow for a better characterization of the clinical course of the disease. Third,  
38  
39 292 23.1% of patients did not report information on ethnoracial self-classification, 10.8% did not  
40  
41 293 have information on ICU admission, and for 2.1% there was no information on clinical outcome.  
42  
43 294 This is not uncommon in the analysis of administrative records.<sup>22</sup> Here we report all records and  
44  
45 295 included an additional category (ethnoracial self-classification not reported) in the risk factor  
46  
47 296 analysis.

1  
2  
3 297 Despite these limitations, this study provides a comprehensive description of characteristics,  
4  
5 298 outcomes, and risk factors for mortality of patients hospitalized with COVID-19 in Brazil, and  
6  
7 299 the largest cohort of patients so far analyzed (N=522,167). Results shed light on commonalities  
8  
9  
10 300 and differences between Brazil and other countries affected by COVID-19, and highlight  
11  
12 301 inequalities in disease outcomes. Most importantly, our results could be used to inform  
13  
14 302 coordinated actions to target those who currently bear the highest morbidity and mortality  
15  
16 303 burden. Currently, Brazil's response to COVID-19 did not comprehensively and effectively  
17  
18 304 utilize its community-based primary health care program.<sup>28-30</sup> Brazil has a network of almost  
19  
20 305 270,000 community health workers that reach out to about 70% of the Brazilian population.  
21  
22 306 These agents could actively identify vulnerable people who face higher risk of mortality, could  
23  
24 307 act as agents of information to sensitize the population and boost adherence to control measures  
25  
26 308 (e.g., use of masks), and could continue to deliver community-based primary care services that  
27  
28 309 have been, for the most part, interrupted by the pandemic. These agents will also be important to  
29  
30 310 support the delivery of vaccination (once it starts) to the most vulnerable. Currently, with more  
31  
32 311 than 200,000 deaths and with hospital occupancy increasing at alarming rates, leveraging and  
33  
34 312 strengthening the existing network of primary health care is paramount to contain the sustained  
35  
36 313 and unequal burden of COVID-19 in Brazil.  
37  
38  
39  
40  
41  
42  
43  
44

45 315 **Contributors:** MCC and GVAF conceived the study, were responsible for data analysis and  
46  
47 316 interpretation. MCC wrote the manuscript. GVAF and EMM acquired the data. GVAF and SG  
48  
49 317 were responsible for data curation. SG ran the statistical models and contributed to writing. All  
50  
51 318 authors edited and approved the final version of the manuscript.  
52  
53  
54  
55  
56  
57  
58  
59  
60



1  
2  
3 319 **Funding:** This research received no specific grant from any funding agency in the public,  
4  
5 320 commercial or not-for-profit sectors.  
6  
7

8  
9 321 **Competing interests:** None declared.  
10

11  
12 322 **Data availability statement:** The *SIVEP-Gripe* dataset is publicly available on the Ministry of  
13  
14 323 Health's DATASUS website (<https://opendatasus.saude.gov.br/nl/dataset>).  
15  
16

17 324 **Acknowledgements:** We would like to thank Nicholas Arisco, M.S., for technical assistance.  
18  
19 325

20  
21  
22 326 **Figure 1: Age distribution of patients, density curves of length of time from hospital**  
23  
24 327 **admission to death, and survival curve 60 days after hospital admission.** (a) Age distribution  
25  
26 328 of patients hospitalized. (b) Age distribution of in-hospital deaths. (c) Density of number of days  
27  
28 329 from hospital admission to death up to 60 days after hospital admission, detailed by ICU  
29  
30 330 admission status. (d) Survival curve estimated with Kaplan Meier and considering 60 days from  
31  
32 331 hospital admission.  
33  
34  
35  
36  
37  
38  
39  
40  
41  
42  
43  
44  
45  
46  
47  
48  
49  
50  
51  
52  
53  
54  
55  
56  
57  
58  
59  
60

## 332 References

- 333 1. World Health Organization. Coronavirus disease (COVID-19) outbreak situation:  
334 <https://www.who.int/emergencies/diseases/novel-coronavirus-2019>, 2021.
- 335 2. Brasil, Ministério da Saúde. A experiência brasileira em sistemas de informação em saúde.  
336 Série B Textos Básicos de Saúde. Brasília: Ministério da Saúde, Organização Pan-Americana  
337 da Saúde, Fundação Oswaldo Cruz. Available at:  
338 [http://bvsmis.saude.gov.br/bvsmis/publicacoes/experiencia\\_brasileira\\_sistemas\\_saude\\_volume2.p](http://bvsmis.saude.gov.br/bvsmis/publicacoes/experiencia_brasileira_sistemas_saude_volume2.pdf)  
339 [df](http://bvsmis.saude.gov.br/bvsmis/publicacoes/experiencia_brasileira_sistemas_saude_volume2.pdf), 2009.
- 340 3. Lima-Costa MF, Rodrigues LC, Barreto ML, et al. Genomic ancestry and ethnoracial self-  
341 classification based on 5,871 community-dwelling Brazilians (The Epigen Initiative).  
342 *Scientific Reports* 2015;5(1):9812. doi: 10.1038/srep09812
- 343 4. Brasil, Ministério da Saúde. Guia de Vigilância Epidemiológica. Emergência de Saúde Pública  
344 de Importância Nacional pela Doença pelo Coronavírus 2019. Vigilância de Síndromes  
345 Respiratórias Agudas COVID-19. August 5, 2020 ed: Ministério da Saúde.  
346 [https://portalarquivos.saude.gov.br/images/af\\_gvs\\_coronavirus\\_6ago20\\_ajustes-finais-2.pdf](https://portalarquivos.saude.gov.br/images/af_gvs_coronavirus_6ago20_ajustes-finais-2.pdf),  
347 2020.
- 348 5. Zheng Z, Peng F, Xu B, et al. Risk factors of critical & mortal COVID-19 cases: A systematic  
349 literature review and meta-analysis. *J Infect* 2020:S0163-4453(20)30234-6. doi:  
350 10.1016/j.jinf.2020.04.021
- 351 6. Li X, Xu S, Yu M, et al. Risk factors for severity and mortality in adult COVID-19 inpatients  
352 in Wuhan. *Journal of Allergy and Clinical Immunology* 2020;146(1):110-18. doi:  
353 <https://doi.org/10.1016/j.jaci.2020.04.006>

- 1  
2  
3 354 7. Esai Selvan M. Risk factors for death from COVID-19. *Nature Reviews Immunology* 2020  
4  
5 355 doi: 10.1038/s41577-020-0351-0  
6  
7  
8 356 8. Chen N, Zhou M, Dong X, et al. Epidemiological and clinical characteristics of 99 cases of  
9  
10 357 2019 novel coronavirus pneumonia in Wuhan, China: a descriptive study. *Lancet*  
11  
12 358 2020;395(10223):507-13. doi: 10.1016/s0140-6736(20)30211-7 [published Online First:  
13  
14 359 2020/02/03]  
15  
16  
17 360 9. Zhou F, Yu T, Du R, et al. Clinical course and risk factors for mortality of adult inpatients  
18  
19 361 with COVID-19 in Wuhan, China: a retrospective cohort study. *The Lancet* 2020 doi:  
20  
21 362 10.1016/S0140-6736(20)30566-3  
22  
23  
24 363 10. Lai CC, Liu YH, Wang CY, et al. Asymptomatic carrier state, acute respiratory disease, and  
25  
26 364 pneumonia due to severe acute respiratory syndrome coronavirus 2 (SARS-CoV-2): Facts and  
27  
28 365 myths. *J Microbiol Immunol Infect* 2020;53(3):404-12. doi: 10.1016/j.jmii.2020.02.012  
29  
30 366 [published Online First: 2020/03/17]  
31  
32  
33 367 11. Karagiannidis C, Mostert C, Hentschker C, et al. Case characteristics, resource use, and  
34  
35 368 outcomes of 10021 patients with COVID-19 admitted to 920 German hospitals: an  
36  
37 369 observational study. *The Lancet Respiratory Medicine* 2020 doi: 10.1016/S2213-  
38  
39 370 2600(20)30316-7  
40  
41  
42 371 12. Grasselli G, Zangrillo A, Zanella A, et al. Baseline Characteristics and Outcomes of 1591  
43  
44 372 Patients Infected With SARS-CoV-2 Admitted to ICUs of the Lombardy Region, Italy. *Jama*  
45  
46 373 2020;323(16):1574-81. doi: 10.1001/jama.2020.5394 [published Online First: 2020/04/07]  
47  
48  
49 374 13. Grasselli G, Pesenti A, Cecconi M. Critical Care Utilization for the COVID-19 Outbreak in  
50  
51 375 Lombardy, Italy: Early Experience and Forecast During an Emergency Response. *JAMA* 2020  
52  
53 376 doi: 10.1001/jama.2020.4031  
54  
55  
56  
57  
58  
59

- 1  
2  
3 377 14. Salje H, Tran Kiem C, Lefrancq N, et al. Estimating the burden of SARS-CoV-2 in France.  
4  
5 378 *Science* 2020;369(6500):208-11. doi: 10.1126/science.abc3517  
6  
7  
8 379 15. Guan W-j, Ni Z-y, Hu Y, et al. Clinical Characteristics of Coronavirus Disease 2019 in  
9  
10 380 China. *New England Journal of Medicine* 2020 doi: 10.1056/NEJMoa2002032  
11  
12 381 16. Macinko J, Leventhal DGP, Lima-Costa MF. Primary Care and the Hypertension Care  
13  
14 382 Continuum in Brazil. *Journal of Ambulatory Care Management* 2018;41(1):34-46. doi:  
15 383 10.1097/JAC.0000000000000222  
16  
17  
18  
19 384 17. Richardson S, Hirsch JS, Narasimhan M, et al. Presenting Characteristics, Comorbidities, and  
20  
21 385 Outcomes Among 5700 Patients Hospitalized With COVID-19 in the New York City Area.  
22  
23 386 *JAMA* 2020;323(20):2052-59. doi: 10.1001/jama.2020.6775  
24  
25  
26 387 18. Baqui P, Bica I, Marra V, et al. Ethnic and regional variations in hospital mortality from  
27  
28 388 COVID-19 in Brazil: a cross-sectional observational study. *The Lancet Global Health*  
29  
30 389 2020;Published: July 02, 2020 doi: 10.1016/S2214-109X(20)30285-0  
31  
32  
33 390 19. Price-Haywood EG, Burton J, Fort D, et al. Hospitalization and Mortality among Black  
34  
35 391 Patients and White Patients with Covid-19. *New England Journal of Medicine*  
36  
37 392 2020;382(26):2534-43. doi: 10.1056/NEJMsa2011686  
38  
39  
40 393 20. Cordes J, Castro MC. Spatial analysis of COVID-19 clusters and contextual factors in New  
41  
42 394 York City. *Spatial and Spatio-temporal Epidemiology* 2020;34:100355. doi:  
43  
44 395 <https://doi.org/10.1016/j.sste.2020.100355>  
45  
46  
47 396 21. Golestaneh L, Neugarten J, Fisher M, et al. The association of race and COVID-19 mortality.  
48  
49 397 *EClinicalMedicine* 2020;Published: July 14, 2020 doi: 10.1016/j.eclinm.2020.100455  
50  
51  
52  
53  
54  
55  
56  
57  
58  
59  
60

- 1  
2  
3 398 22. Williamson E, Walker AJ, Bhaskaran KJ, et al. OpenSAFELY: factors associated with  
4  
5 399 COVID-19-related hospital death in the linked electronic health records of 17 million adult  
6  
7 400 NHS patients. *medRxiv* 2020:2020.05.06.20092999. doi: 10.1101/2020.05.06.20092999  
9  
10 401 23. Castro MC, Resende de Carvalho L, Chin T, et al. Demand for hospitalization services for  
11  
12 402 COVID-19 patients in Brazil. *medRxiv* 2020:2020.03.30.20047662. doi:  
13  
14 403 10.1101/2020.03.30.20047662  
16  
17 404 24. Sousa Júnior WCd, Gonçalves DA, Cruz DB. COVID-19: Local/regional inequalities and  
18  
19 405 impacts over critical healthcare infrastructure in Brazil. *Ambiente & Sociedade* 2020;23  
20  
21 406 25. Menezes Filho N, Kirschbaum C. Education and Inequality in Brazil. In: Arretche M, ed.  
22  
23 407 Paths of Inequality in Brazil: A Half-Century of Changes. Cham: Springer International  
24  
25 408 Publishing 2019:69-88.  
26  
27 409 26. Carvalho LR, Andrade MV, Amaral PVM. Avaliação dos parâmetros de oferta mínimos para  
28  
29 410 os leitos SUS no Brasil, 2015. *Planejamento e Políticas Públicas - PPP/Ipea* 2020;In Press  
30  
31 411 27. Castro MC, Massuda A, Almeida G, et al. Brazil's unified health system: the first 30 years  
32  
33 412 and prospects for the future. *Lancet* 2019;394(10195):345-56. doi: 10.1016/s0140-  
34  
35 413 6736(19)31243-7 [published Online First: 2019/07/16]  
36  
37 414 28. Avelar e Silva RN, Russo G, Matijasevich A, et al. Covid-19 in Brazil has exposed socio-  
38  
39 415 economic inequalities and underfunding of its public health system. *BMJ Opinion* 2020;June  
40  
41 416 19  
42  
43 417 29. Daumas RP, Silva GAe, Tasca R, et al. O papel da atenção primária na rede de atenção à  
44  
45 418 saúde no Brasil: limites e possibilidades no enfrentamento da COVID-19. *Cadernos de Saúde*  
46  
47 419 *Pública* 2020;36  
48  
49  
50  
51  
52  
53  
54  
55  
56  
57  
58  
59  
60

- 1  
2  
3 420 30. Lotta G, Wenham C, Nunes J, et al. Community health workers reveal COVID-19 disaster in  
4  
5 421 Brazil. *Lancet* 2020 doi: 10.1016/s0140-6736(20)31521-x [published Online First:  
6  
7 422 2020/07/14]  
8  
9  
10 423  
11  
12  
13  
14  
15  
16  
17  
18  
19  
20  
21  
22  
23  
24  
25  
26  
27  
28  
29  
30  
31  
32  
33  
34  
35  
36  
37  
38  
39  
40  
41  
42  
43  
44  
45  
46  
47  
48  
49  
50  
51  
52  
53  
54  
55  
56  
57  
58  
59  
60

(a)



(b)

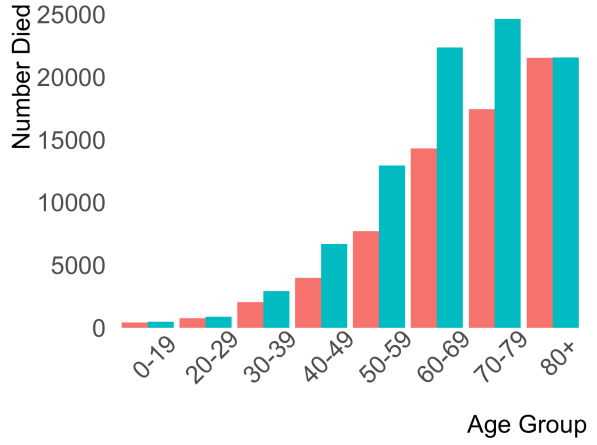

Female Male

(c)



ICU No Yes

(d)



Age Groups 0-39 40-59 60-69 70-79 80+

1  
2  
3  
4  
5  
6  
7 **Supplementary material for “Characteristics, outcomes and risk factors for mortality of 522,167**  
8 **patients hospitalized with COVID-19 in Brazil: a retrospective cohort study”**  
9

10  
11  
12  
13  
14  
15  
16  
17  
18  
19  
20  
21  
22  
23  
24  
25  
26  
27  
28  
29  
30  
31  
32  
33  
34  
35  
36  
37  
38  
39  
40  
41  
42  
43  
44  
45  
46  
47  
48  
49  
50  
51  
52  
53  
54  
55  
56  
57  
58  
59  
60

For peer review only



**Supplementary Table 1: Data completeness in the dataset of hospitalized individuals with confirmed COVID-19 from SIVEP-Gripe data (as of December 14, 2020)**

| Variable                                               | Missing | N       | % Complete |
|--------------------------------------------------------|---------|---------|------------|
| Hospitalization                                        | 0       | 522,167 | 100%       |
| Final diagnosis of the case                            | 0       | 522,167 | 100%       |
| Age informed by patient                                | 0       | 522,167 | 100%       |
| Type of age (day, month, year)                         | 0       | 522,167 | 100%       |
| Sex                                                    | 84      | 522,167 | 100%       |
| Gestational age                                        | 26,081  | 299,513 | 91%        |
| Puerperal <sup>a</sup>                                 | 133,695 | 299,513 | 55%        |
| Ethnoracial self-classification                        | 120,799 | 522,167 | 77%        |
| Federal unit of residence                              | 0       | 522,167 | 100%       |
| Municipality of residence <sup>b</sup>                 | 36      | 522,167 | 100%       |
| Municipality of notification                           | 0       | 522,167 | 100%       |
| Comorbidities <sup>a</sup>                             |         |         |            |
| Chronic cardiovascular disease                         | 246,121 | 522,167 | 53%        |
| Chronic hematologic diseases                           | 314,925 | 522,167 | 40%        |
| Chronic hepatic disease                                | 315,473 | 522,167 | 40%        |
| Asthma                                                 | 311,743 | 522,167 | 40%        |
| Diabetes                                               | 264,470 | 522,167 | 49%        |
| Chronic neurological disease                           | 309,103 | 522,167 | 41%        |
| Chronic lung disease                                   | 309,631 | 522,167 | 41%        |
| Immunodeficiency                                       | 312,874 | 522,167 | 40%        |
| Chronic renal disease                                  | 309,780 | 522,167 | 41%        |
| Obesity                                                | 306,964 | 522,167 | 41%        |
| Other comorbidities                                    | 272,160 | 522,167 | 48%        |
| Symptoms <sup>a</sup>                                  |         |         |            |
| Fever                                                  | 65,355  | 522,167 | 87%        |
| Cough                                                  | 56,324  | 522,167 | 89%        |
| Sore throat                                            | 140,061 | 522,167 | 73%        |
| Shortness of breath                                    | 56,843  | 522,167 | 89%        |
| Respiratory distress syndrome                          | 90,093  | 522,167 | 83%        |
| Other symptoms descriptive                             | 272,160 | 522,167 | 48%        |
| Chest radiograph result                                | 222,990 | 522,167 | 57%        |
| Type of drug treatment <sup>a</sup>                    | 434,008 | 522,167 | 17%        |
| Mechanical ventilation                                 | 75,907  | 522,167 | 85%        |
| ICU admission                                          | 56,310  | 522,167 | 89%        |
| Date of ICU discharge <sup>c</sup>                     | 46,919  | 522,167 | 91%        |
| Date of hospital discharge of death <sup>c</sup>       | 31,755  | 522,167 | 94%        |
| Date of onset of illness                               | 0       | 522,167 | 100%       |
| Date of treatment with drugs                           | 6,993   | 93,688  | 93%        |
| Date of hospitalization <sup>c</sup>                   | 3,170   | 522,167 | 99%        |
| Date of ICU admission <sup>c</sup>                     | 3,580   | 172,473 | 98%        |
| Date of case closed                                    | 8,457   | 468,664 | 98%        |
| Clinical outcome (discharge, death, still in hospital) | 11,126  | 522,167 | 98%        |

a. Unlike other fields (such as age and sex), comorbidities, symptoms, peruperal, and drugs are not mandatory. Non-response does not necessarily mean missing information, but absence of those conditions.

b. The 36 observations missing municipality of residence are foreigners.

c. Missingness in several date variables could be resolved by cross-checking with other variables. Doing so reduced missingness by 0.04-10.3 percentage points from the original missingness shown above.

**Supplementary Figure 1: Cumulative number of COVID-19 hospitalizations, ICU admissions, and deaths.** Although hospitalizations occurred early in January, confirmed laboratory results were only made available in late February.



view only

**Supplementary Figure 2: Survival curves (Kaplan Meier) 60 days after hospital admission:**

Note: N = North, NE = Northeast, CW = Center-West, SE = Southeast, S = South



## STROBE Statement—checklist of items that should be included in reports of observational studies

|                              | Item No | Recommendation                                                                                                                                                                                                                                                                                                                                                                                                                                                         | Page No |
|------------------------------|---------|------------------------------------------------------------------------------------------------------------------------------------------------------------------------------------------------------------------------------------------------------------------------------------------------------------------------------------------------------------------------------------------------------------------------------------------------------------------------|---------|
| <b>Title and abstract</b>    | 1       | (a) Indicate the study's design with a commonly used term in the title or the abstract                                                                                                                                                                                                                                                                                                                                                                                 | 1       |
|                              |         | (b) Provide in the abstract an informative and balanced summary of what was done and what was found                                                                                                                                                                                                                                                                                                                                                                    | 2       |
| <b>Introduction</b>          |         |                                                                                                                                                                                                                                                                                                                                                                                                                                                                        |         |
| Background/rationale         | 2       | Explain the scientific background and rationale for the investigation being reported                                                                                                                                                                                                                                                                                                                                                                                   | 4       |
| Objectives                   | 3       | State specific objectives, including any prespecified hypotheses                                                                                                                                                                                                                                                                                                                                                                                                       | 4       |
| <b>Methods</b>               |         |                                                                                                                                                                                                                                                                                                                                                                                                                                                                        |         |
| Study design                 | 4       | Present key elements of study design early in the paper                                                                                                                                                                                                                                                                                                                                                                                                                | 5       |
| Setting                      | 5       | Describe the setting, locations, and relevant dates, including periods of recruitment, exposure, follow-up, and data collection                                                                                                                                                                                                                                                                                                                                        | 4-5     |
| Participants                 | 6       | (a) <i>Cohort study</i> —Give the eligibility criteria, and the sources and methods of selection of participants. Describe methods of follow-up<br><i>Case-control study</i> —Give the eligibility criteria, and the sources and methods of case ascertainment and control selection. Give the rationale for the choice of cases and controls<br><i>Cross-sectional study</i> —Give the eligibility criteria, and the sources and methods of selection of participants | 5       |
|                              |         | (b) <i>Cohort study</i> —For matched studies, give matching criteria and number of exposed and unexposed<br><i>Case-control study</i> —For matched studies, give matching criteria and the number of controls per case                                                                                                                                                                                                                                                 |         |
| Variables                    | 7       | Clearly define all outcomes, exposures, predictors, potential confounders, and effect modifiers. Give diagnostic criteria, if applicable                                                                                                                                                                                                                                                                                                                               | 5-6     |
| Data sources/<br>measurement | 8*      | For each variable of interest, give sources of data and details of methods of assessment (measurement). Describe comparability of assessment methods if there is more than one group                                                                                                                                                                                                                                                                                   | 5       |
| Bias                         | 9       | Describe any efforts to address potential sources of bias                                                                                                                                                                                                                                                                                                                                                                                                              | 6       |
| Study size                   | 10      | Explain how the study size was arrived at                                                                                                                                                                                                                                                                                                                                                                                                                              | 5       |
| Quantitative variables       | 11      | Explain how quantitative variables were handled in the analyses. If applicable, describe which groupings were chosen and why                                                                                                                                                                                                                                                                                                                                           | 6       |
| Statistical methods          | 12      | (a) Describe all statistical methods, including those used to control for confounding                                                                                                                                                                                                                                                                                                                                                                                  | 5-6     |
|                              |         | (b) Describe any methods used to examine subgroups and interactions                                                                                                                                                                                                                                                                                                                                                                                                    |         |
|                              |         | (c) Explain how missing data were addressed                                                                                                                                                                                                                                                                                                                                                                                                                            |         |
|                              | 6       | (d) <i>Cohort study</i> —If applicable, explain how loss to follow-up was addressed<br><i>Case-control study</i> —If applicable, explain how matching of cases and controls was addressed<br><i>Cross-sectional study</i> —If applicable, describe analytical methods taking account of sampling strategy                                                                                                                                                              |         |
|                              |         | (e) Describe any sensitivity analyses                                                                                                                                                                                                                                                                                                                                                                                                                                  |         |

Continued on next page

1  
2  
3  
4  
5  
6  
7  
8  
9  
10  
11  
12  
13  
14  
15  
16  
17  
18  
19  
20  
21  
22  
23  
24  
25  
26  
27  
28  
29  
30  
31  
32  
33  
34  
35  
36  
37  
38  
39  
40  
41  
42  
43  
44  
45  
46  
47  
48  
49  
50  
51  
52  
53  
54  
55  
56  
57  
58  
59  
60

| <b>Results</b>           |     |                                                                                                                                                                                                              |       |
|--------------------------|-----|--------------------------------------------------------------------------------------------------------------------------------------------------------------------------------------------------------------|-------|
| Participants             | 13* | (a) Report numbers of individuals at each stage of study—eg numbers potentially eligible, examined for eligibility, confirmed eligible, included in the study, completing follow-up, and analysed            | 7     |
|                          |     | (b) Give reasons for non-participation at each stage                                                                                                                                                         |       |
|                          |     | (c) Consider use of a flow diagram                                                                                                                                                                           |       |
| Descriptive data         | 14* | (a) Give characteristics of study participants (eg demographic, clinical, social) and information on exposures and potential confounders                                                                     | 7-9   |
|                          |     | (b) Indicate number of participants with missing data for each variable of interest                                                                                                                          | 7-8   |
|                          |     | (c) <i>Cohort study</i> —Summarise follow-up time (eg, average and total amount)                                                                                                                             |       |
| Outcome data             | 15* | <i>Cohort study</i> —Report numbers of outcome events or summary measures over time                                                                                                                          | 7-10  |
|                          |     | <i>Case-control study</i> —Report numbers in each exposure category, or summary measures of exposure                                                                                                         |       |
|                          |     | <i>Cross-sectional study</i> —Report numbers of outcome events or summary measures                                                                                                                           | 7-10  |
| Main results             | 16  | (a) Give unadjusted estimates and, if applicable, confounder-adjusted estimates and their precision (eg, 95% confidence interval). Make clear which confounders were adjusted for and why they were included | 13-14 |
|                          |     | (b) Report category boundaries when continuous variables were categorized                                                                                                                                    | 7-11  |
|                          |     | (c) If relevant, consider translating estimates of relative risk into absolute risk for a meaningful time period                                                                                             |       |
| Other analyses           | 17  | Report other analyses done—eg analyses of subgroups and interactions, and sensitivity analyses                                                                                                               |       |
| <b>Discussion</b>        |     |                                                                                                                                                                                                              |       |
| Key results              | 18  | Summarise key results with reference to study objectives                                                                                                                                                     | 14-18 |
| Limitations              | 19  | Discuss limitations of the study, taking into account sources of potential bias or imprecision. Discuss both direction and magnitude of any potential bias                                                   | 17    |
| Interpretation           | 20  | Give a cautious overall interpretation of results considering objectives, limitations, multiplicity of analyses, results from similar studies, and other relevant evidence                                   | 14-18 |
| Generalisability         | 21  | Discuss the generalisability (external validity) of the study results                                                                                                                                        | 18    |
| <b>Other information</b> |     |                                                                                                                                                                                                              |       |
| Funding                  | 22  | Give the source of funding and the role of the funders for the present study and, if applicable, for the original study on which the present article is based                                                | 18    |

\*Give information separately for cases and controls in case-control studies and, if applicable, for exposed and unexposed groups in cohort and cross-sectional studies.

**Note:** An Explanation and Elaboration article discusses each checklist item and gives methodological background and published examples of transparent reporting. The STROBE checklist is best used in conjunction with this article (freely available on the Web sites of PLoS Medicine at <http://www.plosmedicine.org/>, Annals of Internal Medicine at <http://www.annals.org/>, and Epidemiology at <http://www.epidem.com/>). Information on the STROBE Initiative is available at [www.strobe-statement.org](http://www.strobe-statement.org).
